# Developmental stage-specific patterned activity contributes to callosal axon projections

Yuta Tezuka<sup>1#</sup>, Kenta M. Hagihara<sup>2,3#</sup>, Kenichi Ohki<sup>2,4,5,6,8</sup>,  
Tomoo Hirano<sup>1</sup>, and Yoshiaki Tagawa<sup>1,7,8\*</sup>

<sup>1</sup> Department of Biophysics, Kyoto University Graduate School of Science, Kyoto, Japan

<sup>2</sup> Department of Molecular Physiology, Kyushu University Graduate School of Medical Sciences, Fukuoka, Japan

<sup>3</sup> Friedrich Miescher Institute for Biomedical Research, Basel, Switzerland

<sup>4</sup> Department of Physiology, The University of Tokyo School of Medicine, Tokyo, Japan

<sup>5</sup> International Research Center for Neurointelligence (WPI-IRCN), The University of Tokyo, Japan

<sup>6</sup> Institute for AI and Beyond, The University of Tokyo, Tokyo, Japan

<sup>7</sup> Department of Physiology, Graduate School of Medical and Dental Sciences, Kagoshima University, Kagoshima, Japan

<sup>8</sup> CREST, Japan Science and Technology Agency, Saitama, Japan

# : These authors contributed equally to this work

\* : Correspondence to Yoshiaki Tagawa ([tagawa@m.kufm.kagoshima-u.ac.jp](mailto:tagawa@m.kufm.kagoshima-u.ac.jp))

## Abstract

The developing neocortex exhibits patterned spontaneous network activity with various synchrony levels. However, the role of such activity in the formation of cortical circuits remains unclear. We previously reported that the development of callosal axon projections, one of the major long-range axonal projections in the brain, is activity dependent. Here, using a genetic method to manipulate network activity in a stage-specific manner, we demonstrated that spontaneous cortical network activity contributes to the region- and lamina-specific projections of callosal axons in the mouse visual cortex and that this process has a “critical period”: restoring neuronal activity during that period resumed the projections, whereas restoration after the period failed. Furthermore, *in vivo* imaging revealed that less correlated network activity was critical. Together, our findings suggest that a distinct pattern of spontaneous network activity in a specific developmental stage underlies the formation of long-range axonal projections in the developing neocortex.

## Introduction

Neuronal activity plays a role in the formation of neural circuits in the brain (Katz and Shatz, 1996; Spitzer, 2006). The roles of sensory-driven and spontaneously generated neuronal activity in circuit formation are well documented in the mammalian visual system (Wong, 1999; Huberman et al., 2008). Retinal ganglion cells, output neurons in the retinal circuit, exhibit spontaneously generated, highly correlated neuronal activity (called retinal waves) before photoreceptor cells develop (Galli and Maffei, 1988; Meister et al., 1991; Wong et al., 1993). Such activity is transmitted to the lateral geniculate nucleus and the superior colliculus, where it plays an instructive role in the formation and reorganization of neuronal connections (Penn et al., 1998; Stellwagen and Shatz, 2002; Pfeiffenberger et al., 2005; Chandrasekaran et al., 2005; Hooks and Chen, 2006). The connectivity once formed is further sculpted by sensory-driven neuronal activity after visual inputs are available (Hooks and Chen, 2006).

The developing cerebral cortex also exhibits robust spontaneous network activity, ranging from highly synchronous to less correlated patterns (Siegel et al., 2012). This is partly generated intracortically and partly originates from retinal waves (Siegel et al., 2012; Gribizis et al., 2019). In rodents, a highly synchronous pattern of spontaneous neuronal activity emerges during early postnatal periods when cortical neurons still undergo maturation and circuit formation (Garaschuk et al., 2000; Allene et al., 2008; Yang et al., 2009; Siegel et al., 2012). Such activity indicates a heterogeneous traveling pattern in the developing cortex (Garaschuk et al., 2000; Ackman et al., 2012; Hagihara et al., 2015). Subsequently, a more desynchronized pattern becomes dominant (Rockefort et al., 2009; Golshani et al., 2009). Based on findings in the visual system and other systems, these patterns of activity have been thought to play important roles in the development of cortical circuits (Khazipov and Luhmann, 2006; Blankenship and Feller, 2010; Winnubst et al., 2015; Hagihara et al., 2015; Nakazawa et al., 2020). However, their role in cortical circuit formation remains elusive.

Callosal axon projection, a long-range axonal projection connecting the two cortical hemispheres, is

a good model for studying activity-dependent mechanisms of circuit formation (De León Reyes et al., 2020). Callosal axons derived from layer 2/3 callosal projection neurons in one hemisphere project to the other hemisphere through several successive stages by postnatal day 15 (P15) in mice (Mizuno et al., 2007; Wang et al., 2007; Tagawa and Hirano, 2012). This axonal projection is activity-dependent: several groups, including ours, have previously shown that exogenous expression of Kir2.1 (an inward rectifying potassium channel), a genetic method to reduce neuronal activity (Johns et al., 1999), impairs callosal axon projection (Mizuno et al., 2007; Wang et al., 2007; Suarez et al., 2014; Rodriguez-Tornos et al., 2016). Interestingly, when we expressed Kir2.1 in only a small number of neurons and examined the cell-autonomous effect of activity reduction on their axonal projections, we observed that the effect was less than that when we expressed Kir2.1 in a larger number of neurons (Mizuno et al., 2010). We also found that Kir2.1 expression in a large number of neurons reduced not only the activity of individual neurons (Mizuno et al., 2007) but also spontaneous network activity in the cortex during early postnatal periods (Hagihara et al., 2015). These results led us to assume that specific patterns of network activity may have distinct roles in the formation of long-range axonal projections of callosal neurons.

In this report, by reducing and restoring spontaneous network activity in a stage-specific manner by genetic methods, we found that spontaneous network activity characteristic of the early postnatal cortex contributes to the development of callosal axon projection. We also demonstrate that there is a “critical period” for the formation of callosal axon projection: impaired axonal projections by activity reduction could not be recovered after that period, even though activity was restored. Our findings suggest that spontaneous cortical network activity during a limited period in development plays a role in the formation of long-range axonal projections in the developing cerebral cortex.

## Results

### Callosal axons require neuronal activity during P10-15 for their projection

In the visual cortex, callosal axons project densely to

a narrowly restricted region at the border between the primary and secondary visual cortex, in which they terminate primarily in layer 2/3 and less so in layer 5 (Olavarria and Montero, 1984; Mizuno et al., 2007; **Suppl. Fig. 1**). This region- and lamina-specific projection pattern forms by P15 in the mouse (Mizuno et al., 2007). Our group, as well as others, previously showed that Kir2.1 expression disturbs callosal axon development primarily in the second postnatal week (Tagawa and Hirano, 2012). We also reported that Kir2.1 expression strongly reduced spontaneous cortical network activity at P9-10 and P13-14 (Hagihara et al., 2015). These results suggest that network activity around the second postnatal week is involved in the formation of callosal axon projections. In the current study, we sought to confirm this by conducting “rescue” experiments, in which we attempted to restore the activity during P10-14 and asked whether such restored activity could recover the axonal projections.

To control spontaneous network activity in a stage-specific manner during early postnatal periods, we used the Tet-off system to express Kir2.1. In this system, Kir2.1 was expressed without doxycycline (Dox) treatment, and Kir2.1 expression was suppressed in response to Dox treatment (**Fig. 1A**). Using in utero electroporation, we transfected layer 2/3 cortical neurons with two expression vectors (pTRE-Tight2-Kir2.1 and pCAG-tTA<sup>2s</sup>) for the expression of Kir2.1, together with an RFP expression vector (pCAG-TurboRFP) for labeling callosal axon projections (**Fig. 1**; Mizuno et al., 2007; Hagihara et al., 2015).

To test the feasibility of the Tet-off system, we divided the electroporated mice into two groups. We reared the first group of mice without Dox treatment throughout development ( $n = 7$  mice). Under this condition, we observed that RFP-labeled callosal axon projections were impaired at P15 (**Fig. 1B, Supple Fig. 1**), a pattern similar to that observed when we expressed both Kir2.1 and a fluorescent protein under the control of the CAG promoter (Mizuno et al., 2007; **Supple Fig. 1**). This suggests that Kir2.1 expression using the Tet-off system is as effective as that using the CAG promoter. We then reared the second group with Dox throughout development (from E15 to P15; see Methods:  $n=8$  mice). Under this condition, we observed

that RFP-labeled callosal axons projected normally to the contralateral cortex in a region- and lamina-specific manner at P15 (**Fig. 1B, Supple Fig. 1**). This projection pattern was quite similar to the pattern observed when we expressed only a fluorescent protein (i.e., normal pattern of callosal projections: Mizuno et al., 2007; **Supple Fig. 1**), suggesting that Dox treatment effectively suppressed Kir2.1 expression throughout development.

The aim of this study was to determine the role of neuronal activity during P10-14. Therefore, we used the same set of plasmids for in utero electroporation and began Dox treatment during the postnatal period. Because Dox treatment for 4 days was almost enough to suppress gene expression in the Tet-off system (**Suppl. Fig. 2**), we started Dox treatment from P6 and continued it until P15 ( $n=10$  mice). Under this condition, we observed that RFP-labeled callosal axons reached the innervation area in the contralateral cortex and ramified in a laminar specific manner at P15 (**Fig. 1B, C**). This projection pattern appeared comparable to the normal pattern of callosal axon projections (**Fig. 1B, C**). Because reaching and ramifying in layers 2/3 is a critical developmental step for the formation of callosal axon projections (Mizuno et al., 2007; Wang et al., 2007; Tagawa and Hirano, 2012), we quantified the strength of RFP signals in layers 2/3. Quantitative analyses suggested that the extent of callosal axons arriving and ramifying in the target cortical layer (see Methods) was comparable between the Dox P6-15 and Dox E15-P15 groups ( $p=0.96$ , Tukey-Kramer test: **Fig. 1D**) and that it was greater in the Dox P6-15 group than in the no Dox group ( $p=0.002$ , Tukey-Kramer test: **Fig. 1D**). Thus, Dox treatment at P6-15, which likely shut off Kir2.1 expression from P10 to P15, was effective for the formation of callosal axon projections, implying that callosal axons require neuronal activity during P10-15 to form their projections.

An important role of neuronal activity in P10-15 was also suggested by another experiment using the DREADD (Designer Receptors Exclusively Activated by Designer Drugs) method. DREADD is a method to increase or decrease neuronal activity using a nonendogenous ligand clozapine-N-oxide (CNO) (Alexander et al., 2009). Activation of hM3DGq, one of the artificial G-protein-coupled receptors used in

DREADD technology, in hippocampal neurons causes depolarization of the membrane potential, resulting in an increase in neuronal activity (Alexander et al., 2009). We transfected layer 2/3 cortical neurons with the expression vector pCAG-hM3DGq, together with the pCAG-TurboRFP and pCAG-Kir2.1 plasmids, by in utero electroporation at E15 (**Fig. 2A**). We observed that the electroporated mice with CNO injections from P10-14 (n=11 mice) exhibited a region- and lamina-specific projection pattern of RFP-labeled callosal axons in the contralateral cortex (**Fig. 2B**). Neither of the two control groups of mice (n=10 mice for Kir2.1+hM3DGq with saline injection P10-14, n=4 mice for Kir2.1 with CNO injection P10-14) exhibited such axonal projections (**Fig. 2B**, data not shown). Quantitative analyses suggested a partial but significant “rescue” effect of hM3DGq expression with CNO injections against the effect of Kir2.1 expression on callosal axon projections (**Fig. 2C**). These results suggest that the resumption of neuronal activity during P10-15 is effective for the formation of callosal axon projections.

### A critical period for the formation of callosal projections

Callosal axons from Kir2.1-expressing neurons arrive in the white matter of the target innervation areas around P5, the same time as normal callosal axons (Mizuno et al., 2007). Afterwards, they exhibit retarded and eventually stalled growth and development. As shown above, callosal axons can form region- and lamina-specific projection patterns when their activity is resumed around P10. How long do they retain the ability to grow into the target cortical areas and make lamina-specific branches after reaching the target innervation areas around P5? We found that the region- and lamina-specific projection pattern of callosal axons could not be recovered when Dox treatment was started later than P9. We performed in utero electroporation with the same set of plasmids as before (**Fig. 1A, 3A**), started Dox treatment from P9 or P12, and then assessed callosal axon projections at P18 or P21 (n=9 mice for Dox treatment P9-18; n=10 mice for Dox treatment P12-21). Contrary to the result of Dox treatment during P6-15, callosal axons were not present in the target innervation areas in either group of mice

(**Fig. 3B**). The extent of callosal axons arriving and ramifying in the target cortical layer (see Methods) was significantly lower in the Dox P9-18 and Dox P12-21 groups than in the Dox P6-15 group ( $p < 0.001$ , Tukey-Kramer test; **Fig. 3C**). These observations suggest that callosal axons retain the ability to grow into the target innervation areas and make lamina-specific branches only for a limited period during development.

### Patterns of network activity contributing to callosal axon projections

It has been shown that spontaneous network activity frequently occurs in the early postnatal cerebral cortex. Such network activity can be classified as a highly synchronous pattern (H events) or a less correlated pattern (L events) (Siegel et al., 2012). In the visual cortex, these events are mechanistically distinct (Siegel et al., 2012): H events are mostly of cortical origin, whereas L events are driven by activity in the retina. They may have distinct roles in cortical circuit formation (Cheyne et al., 2019; Wosniac et al., 2021). To gain insight into what pattern(s) of network activity contribute to activity-dependent axonal projections, we recorded spontaneous neuronal activity at P13 using in vivo two-photon  $Ca^{2+}$  imaging (**Fig. 4A**). Consistent with a previous study (Hagihara et al., 2015), control mice (in which the fluorescent protein FP635 was electroporated: n = 5 mice) exhibited frequent spontaneous network events during 10-minute recording sessions (**Fig. 4B, C**), whereas Kir2.1-expressing mice exhibited substantially fewer network events (n=5 mice, **Fig. 4E**). Notably, both Kir2.1-positive and Kir2.1-negative neurons were suppressed. We classified these network events based on a similar criterion to that used in a previous study (Siegel et al., 2012, see Methods): H events, highly synchronous network activity with a participation rate  $> 60\%$ ; L events, less correlated events with a participation rate of 60-20%. We observed both patterns of network activity in control mice at P13 (**Fig. 4F**) (H events,  $1.70 \pm 0.36$  events/min; L events,  $2.16 \pm 0.27$  events/min), and Kir2.1 expression significantly reduced both of them (**Fig. 4F**) (H events,  $0.21 \pm 0.10$  events/min; L events,  $0.62 \pm 0.09$  events/min; H events,  $p = 0.0012$ ; L events,  $p = 0.0008$  by Tukey-Kramer test).

We then asked whether the network activity would



be resumed in the condition where callosal axon projections were recovered (i.e., Kir2.1 expression was turned off beginning from P6). We started Dox treatment on P6 and recorded spontaneous neuronal activity in the electroporated mice at P13 ( $n = 5$  mice). We found that Dox treatment from P6 resumed cortical network activity at P13 (**Fig. 4D**). Unexpectedly, this treatment almost recovered L events, whereas H events were not recovered (H events,  $0.66 \pm 0.21$  events/min; L events,  $2.01 \pm 0.30$  events/min; **Fig. 4G**). This implies that L events, which have a less synchronous pattern of network activity, make a larger contribution to the formation of callosal axon projections, although the involvement of H events or the total frequency of activity cannot be ruled out. Collectively, our observations indicate that patterned spontaneous cortical activity during P10-15 plays an important role in the formation of region- and lamina-specific projection patterns of callosal axons.

## Discussion

In this study, using a genetic method to reduce and restore spontaneous network activity in the early postnatal cerebral cortex, we demonstrated that patterned spontaneous activity characteristic during P10-15 contributes to the formation of region- and lamina-specific projection patterns of callosal axons. Several previous studies have revealed important roles of spontaneous cortical activity in the fine-tuning of local circuits and neural function (Winnubst et al., 2015; Hagihara et al., 2015; Wosniac et al., 2021). Our findings add new evidence of the critical role of spontaneous network activity in cortical circuit formation and demonstrate that not only local circuits but also long-range axonal projections require patterned spontaneous activity for their normal development.

A recent study showed that a developmental change in the firing mode of callosal projection neurons, regulated by transcription factor Cux1-driven Kv1 channel expression, was critically involved in activity-dependent callosal axon projections (Rodriguez-Tornos et al., 2016). Because they assessed the firing property of neurons using *in vitro* slice preparations, what aspect(s) of activity *in vivo* contribute to axonal projection is not known. Our study extends their

findings by demonstrating that patterned spontaneous activity *in vivo* is critical for callosal axon projections.

Patterned spontaneous activity in the developing neocortex can be classified as a highly synchronous pattern (H events) and a less correlated pattern (L events) (Siegel et al., 2012). What could be the roles of these patterns of activity in axonal projections? In retinothalamic and retinocollicular projections, network activity in the retina (retinal waves) is proposed to provide spatial information for axonal projections. It is proposed that two adjacent retinal ganglion cells (RGCs), which likely fire together in a spontaneous network event, would project their axons to an adjacent location in the target tissue. On the other hand, two RGCs located distantly, or even in the left and right eyes, are unlikely to fire together, projecting axons to distinct locations (Wong, 1999). The highly synchronous network activity in the cortex recruits more than 60% of neurons in an imaging field, clearly exceeding the proportion of callosal projection neurons. Callosal projection neurons are intermingled with other types of cortical neurons that project axons intracortically (Mitchell and Macklis, 2005), suggesting that both the former and the latter contribute to H events once they occur. If the highly synchronous activity in the cortex exerts a similar role as retinal waves, it may provide topographic information to callosal axons and other axons projecting to other cortical regions at the same time.

We have shown that although the involvement of H events cannot be ruled out, L events enable the formation of callosal axon projections (**Fig. 4**). In a recent study, we showed that callosal projection neurons preferentially make synaptic connections with neighboring callosal projection neurons and form local subnetworks (Hagihara et al., 2020). Some of the L events observed in this study may reflect the correlated subnetwork activity of callosal projection neurons, and such correlated activity may be critical for their axonal projections. This consideration may lead to a more general and intriguing idea that L events might be coactivations of locally connected cortical neurons, sending axons to the same target region(s).

Network activity may also function to induce some trophic factors. If this is the case, the effect of reducing the activity of a small number of cells could be less than

that of global activity reduction (Mizuno et al, 2010) because surrounding unperturbed cells can supply a “trophic factor” for the perturbed cells. Spitzer et al. showed that BDNF could exert such a function in *Xenopus* spinal neurons (Guemez-Gamboa et al., 2014). They showed that spontaneous firing causes the release of BDNF, which non-cell-autonomously functions to trigger TrkB receptor activation and activity-dependent transmitter switching in the surrounding neurons. BDNF may function in callosal axon projections. BDNF expression is activity-dependent in the cortex (Tao et al., 1998; Lein and Shatz, 2000). It has also been shown that callosal axons require BDNF secretion for their projections (Shimojo et al., 2015). However, simple overexpression of BDNF together with Kir2.1 was unable to “rescue” the impaired axonal projections by Kir2.1 expression (data not shown). Activity-dependent “secretion”, not just expression, of BDNF may be essential, or other factor(s) associated with network activity may be involved.

Highly synchronous and less correlated network activities are characteristically observed in the cortex during early postnatal periods (Rockefort et al., 2009; Golshani et al., 2009; Siegel et al., 2012). Indeed, the “rescue” effect was only observed during P10-15 but not afterwards (**Fig. 3**). A similar developmental time window for the formation of axonal projections was reported in the olfactory system (Ma et al., 2014). Our findings suggest that callosal axons retain the ability, or are permitted, to grow and make region- and lamina-specific projections in the cortex during a limited period of postnatal cortical development. In summary, spontaneous cortical network activity during a limited period in development plays a role in the formation of long-range axonal projections, and specific patterns of network activity may have distinct roles in the developing cerebral cortex.

### Acknowledgements

We thank T. Kitazawa (FMI) for reading and commenting on the manuscript; T. Murakami (U. Tokyo / Kyushu Univ.) for the help in calcium imaging data analysis validation; All the members of Tagawa, Hirano, and Ohki laboratories for discussion.

### Funding

Core Research for Evolutionary Science and Technology (CREST) - Japan Science and Technology Agency (JST) (to K.O. and Y. Tagawa); Brain Mapping by Integrated Neurotechnologies for Disease Studies (Brain/MINDS)-Japan Agency for Medical Research and Development (AMED) (to K.O.); Institute for AI and Beyond (to K.O.); Japan Society for Promotions of Sciences (JSPS) KAKENHI (Grant numbers 25221001, 25117004, 19H01006, and 19H05642 to K.O.; 23500388, 16K06992, and 21K06374 to Y. Tagawa); “Neural Diversity and Neocortical Organization” (23123508 and 25123707 to Y. Tagawa); “Dynamic Regulation of Brain Function by Scrap & Build System” (17H05745 and 19H04756 to Y. Tagawa); Astellas Foundation for Research on Metabolic Disorders (to Y. Tagawa); The Kodama Memorial Fund for Medical Research (to Y. Tagawa); The Novartis Foundation (Japan) for the Promotion of Science (to Y. Tagawa); The Uehara Memorial Foundation (to Y. Tagawa); Takeda Science Foundation (to K.M.H.).

### Author Contributions

Y. Tezuka, K.M.H. and Y. Tagawa initially conceived and designed the research. Y. Tezuka and K.M.H. performed experiments and analyzed the data. T.H. supervised experiments, data analysis, and interpretation of the data. K.O. supervised imaging experiments, data analysis, and interpretation of the data. K.M.H., and Y. Tagawa wrote the manuscript. Y. Tezuka, K.O. and T.H. commented on the manuscript.

## Experimental Procedures

### *Mice*

The ICR strain of mice was used. In utero electroporation was performed in pregnant female mice, and their offspring (both male and female) were used in the study. All experiments were performed in accordance with the institutional animal welfare guidelines of the Animal Care and Use Committee of Kyoto University, Kyushu University and Kagoshima University and were approved by the Committee of Animal Experimentation in the Graduate School of Science, Kyoto University, Graduate School of Medical and Dental Sciences, Kagoshima University, and the Ethical Committee of Kyushu University.

### *In utero electroporation and plasmids*

In utero electroporation was performed as previously described (Mizuno et al., 2007; Hagihara et al., 2015). Briefly, pregnant mice were anesthetized at E15.5 with somnopentyl (pentobarbital sodium; 50 mg per kg of body weight; Kyoritsu-seiyaku) in saline with or without isoflurane. A midline laparotomy was performed to expose the uterus. For DNA microinjection, glass capillary tubes (GD-1; Narishige) were pulled using a micropipette puller (Sutter Instruments). Embryos were injected into the lateral ventricle with 1 microliter of DNA solution (expression plasmids other than pCAG-tTA2<sup>s</sup>, 0.6-1.0 mg ml<sup>-1</sup>; pCAG-tTA2<sup>s</sup>, 0.04-0.1 mg ml<sup>-1</sup>), and square electric pulses (50 V; 50 ms) were delivered five times at the rate of one pulse per second using an electroporator (CUY21EDIT; NepaGene). After electroporation, the uterus was repositioned, the abdominal cavity was filled with prewarmed PBS, and the wall and skin were sutured. Animals were allowed to recover on a heating pad for approximately an hour before returning to their home cage. Plasmids used were as follows. pCAG-tTA2<sup>s</sup> and pTRETight2-Kir2.1 express Kir2.1 under the control of the Tet-off gene expression system (Hagihara et al., 2015). pCAsal-EGFP pCAG-TurboRFP, pCAG-FP635 express fluorescent proteins and pCAG-Kir2.1 for the expression of Kir2.1 under the control of the CAG promoter (Mizuno et al., 2007). pTRETight2-TurboRFP for expression of the fluorescent protein under the control of the Tet-off gene expression system. pCAG-hM3DGq for DREADD experiments. After

birth, animals were anesthetized at P15, P18, or P21 with an overdose of somnopentyl and decapitated.

### *Doxycycline and clozapine N-oxide administration*

Doxycycline (#9891; Sigma-Aldrich) was added to drinking water (2 mg ml<sup>-1</sup>) with 10% sugar. Doxycycline in water was protected from exposure to light and renewed every other day. Pups were exposed to Dox through the mother's milk; electroporated pups were transferred to a foster mother from P6 (or P9 or P12 in the experiments shown in **Fig. 3**) that had been given Dox via the drinking water for a week. In the experiments shown in **Fig. 2**, clozapine N-oxide (BML-NS105; Enzo Life Sciences; 1 mg ml<sup>-1</sup> in saline) was intraperitoneally injected every day.

### *Histology, confocal imaging, and quantification*

Brains were fixed using 4% paraformaldehyde in PBS overnight and then transferred to 30% sucrose in PBS for 1-2 d. Coronal brain slices (50 micrometer) were sectioned using a freezing microtome (LM2000R; Leica). Fluorescent histological images were acquired using a confocal laser-scanning microscope (FV1000; Olympus). To obtain the projection patterns of fluorescently labeled callosal axons for each tissue section (50 micrometers in thickness), serial confocal images were collected at 3 micrometer intervals to create a z-axis image stack. Quantification of the callosal axon projections was performed as previously described with modifications (Mizuno et al., 2007). Briefly, boxes (300 micrometers in width, 100 micrometers in height) were drawn to enclose the fluorescently labeled callosal axon fibers in layers 1-3 and the white matter (WM), and the density of the fluorescent signal in each box was computed. A background level of signal was computed in adjacent areas of the cortex and subtracted. To compensate for variability in the efficacy of labeling callosal axons with fluorescent proteins, the average WM fluorescent signal was obtained on the electroporated side of the cortex and used to normalize the signal intensity on the projection side of the cortex at each brain section. Thus, the normalized signal intensity in layers 1-3 and WM on the projection side of the cortex was calculated by dividing the signal from layers 1-3 or WM on the projection side by the WM signal on the electroporated

side.

### *Spontaneous neuronal activity recording and data analyses*

Mice were prepared for in vivo calcium imaging as previously described (Ohki et al., 2005; Hagihara et al., 2015). In brief, mice were anesthetized using isoflurane (3.0% for induction, 1.0%–2.0% during surgery). A custom-made metal plate was mounted onto the skull, and a craniotomy was carefully performed before calcium imaging approximately above V1 using stereotaxic coordinates. After surgery, the isoflurane concentration was reduced to 0.7%. Because the level of spontaneous activity is greatly affected by the anesthesia level (Siegel et al., 2012), the isoflurane concentration was carefully controlled, and we started recording at least 1 h after the reduction in isoflurane concentration. We dissolved 0.8 mM Oregon Green 488 BAPTA-1 AM (OGB-1) in DMSO with 20% pluronic acid and mixed it with ACSF containing 0.05 mM Alexa594 (Alexa; all obtained from Invitrogen, CA, USA). A glass pipette (3–5  $\mu\text{m}$  tip diameter) was filled with this solution and inserted into the cortex around the center of a craniotomy to a depth of approximately 250  $\mu\text{m}$  from the surface, and then the solution was pressure-ejected from the pipette using a Picospitzer (Parker, US) (–0.5 psi for 1–5 s, 5–10 times). After confirming loading, the craniotomy was sealed with a cover glass. Changes in calcium fluorescence in the cortical neurons were monitored using a two-photon microscope (Zeiss LSM7MP or Nikon A1MP), which was equipped with a mode-locked Ti:sapphire laser (MaiTai Deep See, Spectra Physics). The excitation light was focused with a 25 $\times$  Olympus (NA: 1.05) or Nikon (NA: 1.10) PlanApo objective. The average power delivered to the brain was < 20 mW, depending on the depth of focus. OGB-1 and FP635 were excited at 920 nm. The emission filters were 517–567 nm for OGB-1 and 600–650 nm for FP635. Care was taken to shield the microscope objective and the photomultipliers from stray light. Images were obtained using Zeiss Zen software or Nikon NIS Elements software. A rectangular region (281.6  $\mu\text{m}$   $\times$  140.8  $\mu\text{m}$ ) from layer 2/3 (depths of 150–

300  $\mu\text{m}$  from the surface) was imaged with 512  $\times$  256 pixels at 4 Hz.

Images were analyzed using custom-written in-house software running on in MATLAB (Mathworks) (Ohki et al., 2005; Hagihara et al., 2015). Images were motion corrected by maximizing the correlation between frames. The cell outlines were automatically identified using template matching. The identified cell outlines were visually inspected, and the rare but clear errors were manually corrected. FP635 positive or negative neurons were manually identified. The time courses of individual cells were extracted by averaging the pixel values within the cell outlines, and then, high-cut (Butterworth,  $n = 10$ ; cutoff, 1 s) and low-cut (Gaussian, cutoff, 2 min) filters were applied. Those time courses were further corrected to minimize out-of-focus signal contamination. This process is important because of the highly synchronous characteristics of spontaneous network activity during the developmental stage. To achieve this, neuropil signals were subtracted from cell body signals after multiplying the contamination ratio as previously described (Kerlin et al., 2010; Hagihara et al., 2015). The corrected fluorescence signal from a cell body was estimated as follows:

$$F_{\text{cell-corrected}}(t) = F_{\text{cell-apparent}}(t) - r \times [F_{\text{cell-surrounding}}(t) - \text{mean}(F_{\text{cell-surrounding}})]$$

where  $t$  is the time and  $r$  is the contamination ratio. We calculated the contamination ratio  $r$  for each cell using the least squares method as follows:

$$\{F_{\text{cell}}[t_{\text{base}}] - \text{mean}[F_{\text{cell}}(t_{\text{base}})]\} = r \times \{F_{\text{cell-surround}}[t_{\text{base}}] - \text{mean}[F_{\text{cell-surround}}(t_{\text{base}})]\}$$

where  $t_{\text{base}}$  is a period with no obvious spontaneous activity. After neuropil contamination correction, the spontaneous activity of each cell was detected using fixed criteria:  $\Delta F/F = 5\%$ . Time periods when >20% cells were simultaneously active were regarded as synchronous spontaneous activity. This spontaneous activity was further classified into H events and L events (Siegel et al., 2012) based on the participation rate (H>60%; L: 60–20%). Note that we used slightly different criteria for H and L events because of our rigid neuropil subtraction methods.



## References

- Ackman, J.B., Burbridge, T.J., and Crair, M.C. (2012). Retinal waves coordinate patterned activity throughout the developing visual system. *Nature* 490, 219-225.
- Alexander, G.M., Rogan, S.C., Abbas, A.I., Armbruster, B.N., Pei, Y., Allen, J.A., Nonneman, R.J., Hartmann, J., Moy, S.S., Nicoletis, M.A., *et al.* (2009). Remote control of neuronal activity in transgenic mice expressing evolved G protein-coupled receptors. *Neuron* 63, 27-39.
- Allène, C., Cattani, A., Ackman, J.B., Bonifazi, P., Aniksztejn, L., Ben-Ari, Y., and Cossart, R. (2008). Sequential generation of two distinct synapse-driven network patterns in developing neocortex. *J Neurosci* 28, 12851-12863.
- Blankenship, A. G. and Feller, M. B. (2010). Mechanisms underlying spontaneous patterned activity in developing neural circuits. *Nat Rev Neurosci* 11, 18-29.
- Chandrasekaran, A.R., Plas, D.T., Gonzalez, E., and Crair, M.C. (2005). Evidence for an instructive role of retinal activity in retinotopic map refinement in the superior colliculus of the mouse. *J Neurosci* 25, 6929-6938.
- Cheyne, J. E., Zabouri, N., Baddeley, D. and Lohmann C. (2019). Spontaneous activity patterns are altered in the developing visual cortex of the *Fmr1* knockout mouse. *Front. Neural Circuits* 13:57.
- De León Reyes, N., Bragg-Gonzalo, L. and Nieto, M. (2020). Development and plasticity of the corpus callosum. *Development* 147, 18, dev.189738
- Galli, L., and Maffei, L. (1988). Spontaneous impulse activity of rat retinal ganglion cells in prenatal life. *Science* 242, 90-91.
- Garaschuk, O., Linn, J., Eilers, J., and Konnerth, A. (2000). Large-scale oscillatory calcium waves in the immature cortex. *Nat Neurosci* 3, 452-459.
- Golshani, P., Gonçalves, J.T., Khoshkhou, S., Mostany, R., Smirnakis, S., and Portera-Cailliau, C. (2009). Internally mediated developmental desynchronization of neocortical network activity. *J Neurosci* 29, 10890-10899.
- Gribizis, A., Ge, X., Daigle, T., Ackman, J.B., Zeng, H., Lee, D., and Crair M.C. (2019). Visual cortex gains independence from peripheral drive before eye opening. *Neuron* 104, 711-723.
- Guemez-Gamboa, A., Xu, L., Meng, D., and Spitzer, N.C. (2014). Non-cell-autonomous mechanism of activity-dependent neurotransmitter switching. *Neuron* 82, 1004-1016.
- Hagihara, K.M., Murakami, T., Yoshida, T., Tagawa, Y., and Ohki, K. (2015). Neuronal activity is not required for the initial formation and maturation of visual selectivity. *Nat Neurosci* 18, 1780-1788.
- Hagihara, K.M., Ishikawa, A.W., Yoshimura, Y., Tagawa, Y., and Ohki, K. (2020) Long-range interhemispheric projection neurons show biased response properties and fine-scale local subnetworks in mouse visual cortex. *Cerebral Cortex*, Online ahead of print.
- Hooks, B.M., and Chen, C. (2006). Distinct roles for spontaneous and visual activity in remodeling of the retinogeniculate synapse. *Neuron* 52, 281-291.
- Huberman, A.D., Feller, M.B., and Chapman, B. (2008). Mechanisms underlying development of visual maps and receptive fields. *Annu Rev Neurosci* 31, 479-509.
- Johns, D.C., Marx, R., Mains, R.E., O'Rourke, B., and Marbán, E. (1999). Inducible genetic suppression of neuronal excitability. *J Neurosci* 19, 1691-1697.
- Katz, L., and Shatz, C. (1996). Synaptic activity and the construction of cortical circuits. *Science* 274, 1133-1138.
- Khazipov, R., and Luhmann, H. (2006). Early patterns of electrical activity in the developing cerebral cortex of humans and rodents. *Trends Neurosci* 29, 414-418.
- Kerlin, A.M., Andermann, M.L., Berezovskii, V.K., and Reid, R.C. (2010). Broadly tuned response properties of diverse inhibitory neuron subtypes in mouse visual cortex. *Neuron* 67, 858-871.
- Lein, E.S., and Shatz, C.J. (2000). Rapid regulation of brain-derived neurotrophic factor mRNA within eye-specific circuits during ocular dominance column formation. *J Neurosci* 20, 1470-1483.
- Ma, L., Wu, Y., Qiu, Q., Scheerer, H., Moran, A., and Yu, C.R. (2014). A developmental switch of axon targeting in the continuously regenerating mouse olfactory system. *Science* 344, 194-197.
- Meister, M., Wong, R.O., Baylor, D.A., and Shatz, C.J. (1991). Synchronous bursts of action potentials in ganglion cells of the developing mammalian retina. *Science* 252, 939-943.

- Mitchell, B.D., and Macklis, J.D. (2005). Large-scale maintenance of dual projections by callosal and frontal cortical projection neurons in adult mice. *J Comp Neurol* 482, 17-32.
- Mizuno, H., Hirano, T., and Tagawa, Y. (2007). Evidence for activity-dependent cortical wiring: formation of interhemispheric connections in neonatal mouse visual cortex requires projection neuron activity. *J Neurosci* 27, 6760-6770.
- Mizuno, H., Hirano, T., and Tagawa, Y. (2010). Pre-synaptic and post-synaptic neuronal activity supports the axon development of callosal projection neurons during different post-natal periods in the mouse cerebral cortex. *Eur J Neurosci* 31, 410-424.
- Nakazawa, S., Yoshimura, Y., Takagi, M., Mizuno, H., Iwasato, T. (2020). Developmental phase transitions in spatial organization of spontaneous activity in postnatal barrel cortex layer 4. *J Neurosci* 40, 7637-7650.
- Ohki, K., Chung, S., Chng, Y., Kara, P., and Reid, R. C. (2005) Functional imaging with cellular resolution reveals precise micro-architecture in visual cortex. *Nature* 433, 569-603.
- Olavarria, J., and Montero, V. (1984). Relation of callosal and striate-extrastriate cortical connections in the rat: morphological definition of extrastriate visual areas. *Exp Brain Res* 54, 240-252.
- Penn, A., Riquelme, P., Feller, M., and Shatz, C. (1998). Competition in retinogeniculate patterning driven by spontaneous activity. *Science* 279, 2108-2112.
- Pfeiffenberger, C., Cutforth, T., Woods, G., Yamada, J., Rentería, R.C., Copenhagen, D.R., Flanagan, J.G., and Feldheim, D.A. (2005). Ephrin-As and neural activity are required for eye-specific patterning during retinogeniculate mapping. *Nat Neurosci* 8, 1022-1027.
- Rochefort, N.L., Garaschuk, O., Milos, R.I., Narushima, M., Marandi, N., Pichler, B., Kovalchuk, Y., and Konnerth, A. (2009). Sparsification of neuronal activity in the visual cortex at eye-opening. *Proc Natl Acad Sci U S A* 106, 15049-15054.
- Rodríguez-Tornos, F.M., Briz, C.G., Weiss, L.A., Sebastián-Serrano, A., Ares, S., Navarrete, M., Frangeul, L., Galazo, M., Jabaudon, D., Esteban, J.A., and Nieto, M. (2016). Cux1 Enables Interhemispheric Connections of Layer II/III Neurons by Regulating Kv1-Dependent Firing. *Neuron* 89, 494-506.
- Shimojo, M., Courchet, J., Pieraut, S., Torabi-Rander, N., Sando, R., Polleux, F., and Maximov, A. (2015). SNAREs Controlling Vesicular Release of BDNF and Development of Callosal Axons. *Cell Rep* 11, 1054-1066.
- Siegel, F., Heimel, J.A., Peters, J., and Lohmann, C. (2012). Peripheral and central inputs shape network dynamics in the developing visual cortex in vivo. *Curr Biol* 22, 253-258.
- Spitzer, N.C. (2006). Electrical activity in early neuronal development. *Nature* 444, 707-712.
- Stellwagen, D., and Shatz, C.J. (2002). An instructive role for retinal waves in the development of retinogeniculate connectivity. *Neuron* 33, 357-367.
- Suárez, R., Fenlon, L.R., Marek, R., Avitan, L., Sah, P., Goodhill, G.J., and Richards, L.J. (2014). Balanced interhemispheric cortical activity is required for correct targeting of the corpus callosum. *Neuron* 82, 1289-1298.
- Tagawa, Y., and Hirano, T. (2012). Activity-dependent callosal axon projections in neonatal mouse cerebral cortex. *Neural Plast* 2012, 797295.
- Tao, X., Finkbeiner, S., Arnold, D.B., Shaywitz, A.J., and Greenberg, M.E. (1998). Ca<sup>2+</sup> influx regulates BDNF transcription by a CREB family transcription factor-dependent mechanism. *Neuron* 20, 709-726.
- Wang, C.L., Zhang, L., Zhou, Y., Zhou, J., Yang, X.J., Duan, S.M., Xiong, Z.Q., and Ding, Y.Q. (2007). Activity-dependent development of callosal projections in the somatosensory cortex. *J Neurosci* 27, 11334-11342.
- Winnubst, J., Cheyne, J.E., Niculescu, D., and Lohmann, C. (2015). Spontaneous Activity Drives Local Synaptic Plasticity In Vivo. *Neuron* 87, 399-410.
- Wong, R., Meister, M., and Shatz, C. (1993). Transient period of correlated bursting activity during development of the mammalian retina. *Neuron* 11, 923-938.
- Wong, R.O. (1999). Retinal waves and visual system development. *Annu Rev Neurosci* 22, 29-47.
- Wosniack, M. E., Kirchner, J. H., Chao, L-Y., Zabouri, N., Lohmann, C. and Gjorgjieva, J. (2021). Adaptation of spontaneous activity in the developing visual cortex. *eLife* 10:e61619.
- Yang, J.W., Hanganu-Opatz, I.L., Sun, J.J., and Luhmann, H.J. (2009). Three patterns of oscillatory activity differentially synchronize developing neocortical networks in vivo. *J Neurosci* 29, 9011-9025.

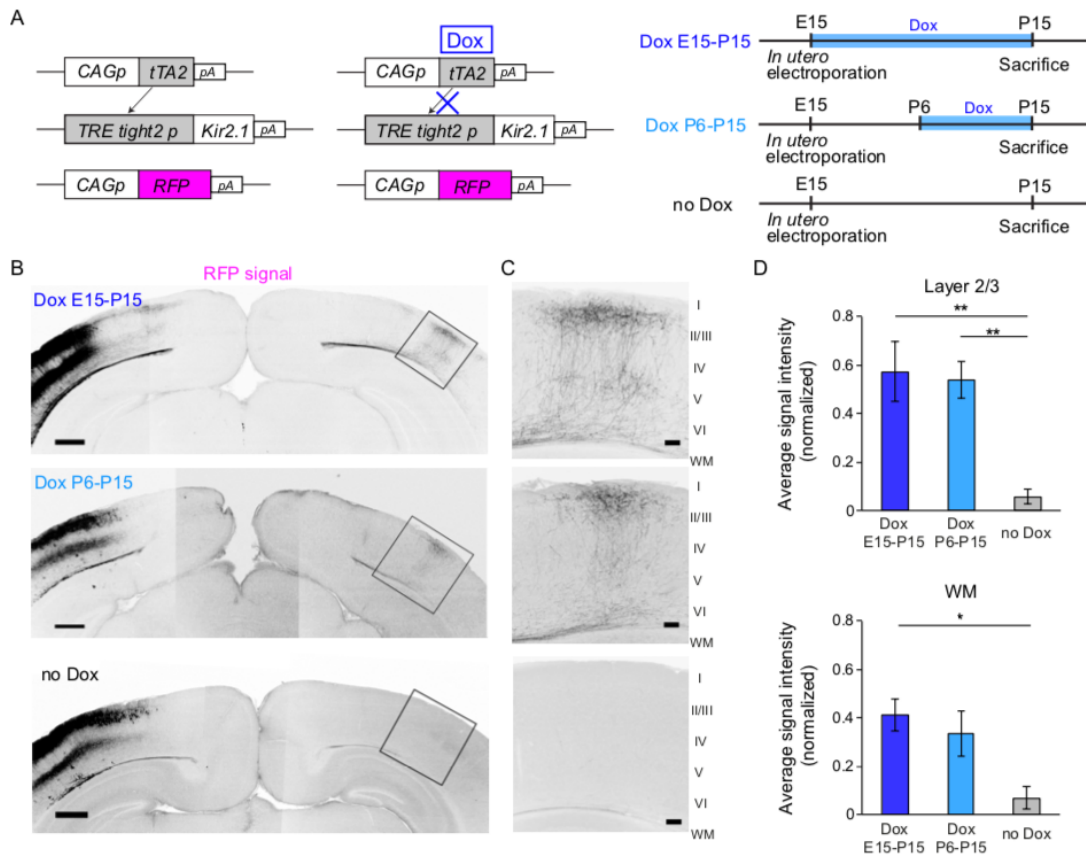

**Figure 1. Restoration of neuronal activity in the second postnatal week recovers callosal axon projections.**

(A) Left, plasmids designed for temporally controlled expression of Kir2.1. Right, experimental timeline. Kir2.1 is a genetic tool to reduce neuronal activity. Transactivator tTA2<sup>s</sup> is expressed under the control of the CAG promoter (CAGp). Without doxycycline (Dox), tTA2<sup>s</sup> binds to the TREtight2 promoter (TREtight2p), and Kir2.1 expression is induced (left). With Dox administration, tTA2<sup>s</sup> cannot bind to the TREtight2 promoter, and Kir2.1 expression is suppressed (right). pA; polyA signal.

(B) Coronal sections through the P15 cerebral cortex show the distribution of neurons expressing fluorescent proteins on the electroporated side and their axonal projections on the other side. Top: “Dox E15-P15” condition where Dox was administered from E15 to P15; thus, Kir2.1 expression was suppressed throughout development. Middle: “Dox P6-P15” condition where Dox was administered from P6 to P15; thus, Kir2.1 expression was suppressed in the second postnatal week. Bottom: “no Dox” condition where Kir2.1 is expressed throughout development. Scale bars, 500 micrometers.

(C) Boxed regions in (B). WM, white matter. Scale bars, 100 micrometers.

(D) Top, average signal intensity of fluorescently labeled callosal axons in layers 1-3. “Dox E15-P15” group: n = 8 sections from 8 mice. “Dox P6-P15” group: n = 10 sections from 10 mice. “no Dox” group: n = 7 sections from 7 mice. \*\*, p < 0.01 by Tukey-Kramer test. Bottom, Average signal intensity of fluorescently labeled callosal axons in the white matter. \*, p < 0.05 by Tukey-Kramer test.

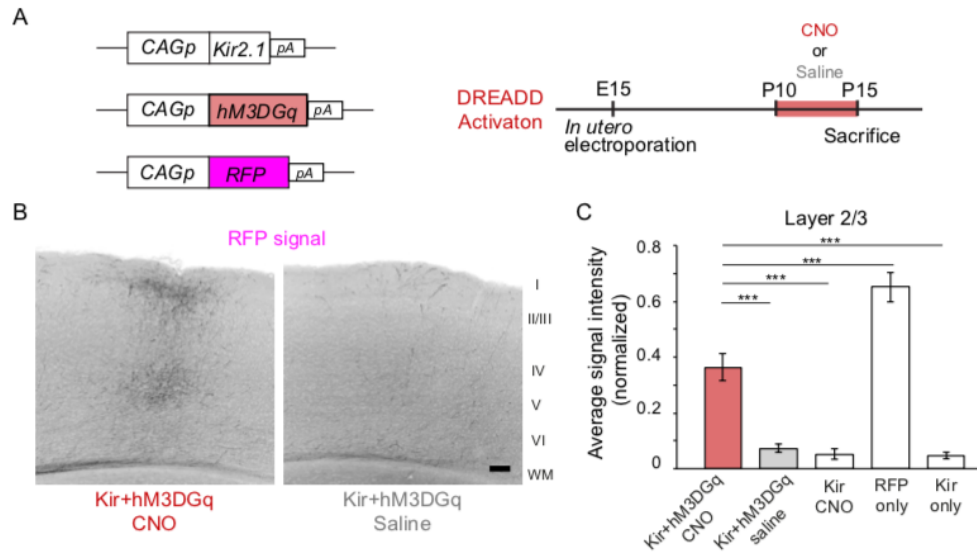

**Figure 2. Effect of activity restoration on callosal axon projections using DREADD.**

(A) Experimental design and timeline. Kir2.1 expression and hM3DGq expression plasmids were transfected at E15, clozapine N-oxide (CNO) or saline was injected daily from P10 to P14, and brains were fixed at P15.

(B) Fluorescently labeled callosal axon projections in the P15 cortex. Scale bar, 100 micrometers.

(C) Average signal intensity of fluorescently labeled callosal axons in layers 1-3. “Kir + hM3DGq with CNO injections” group; n = 11 sections from 11 mice. “Kir + hM3DGq with saline injections” group; n = 10 sections from 10 mice. “Kir with CNO injections” group; n = 4 sections from 4 mice. “RFP” group (pCAG-TurboRFP was electroporated, no injection was performed); n = 10 sections from 10 mice. “Kir” group (pCAG-Kir2.1 was electroporated, no injection was performed); n = 7 sections from 7 mice. \*\*\*, p<0.001 by Tukey-Kramer test.



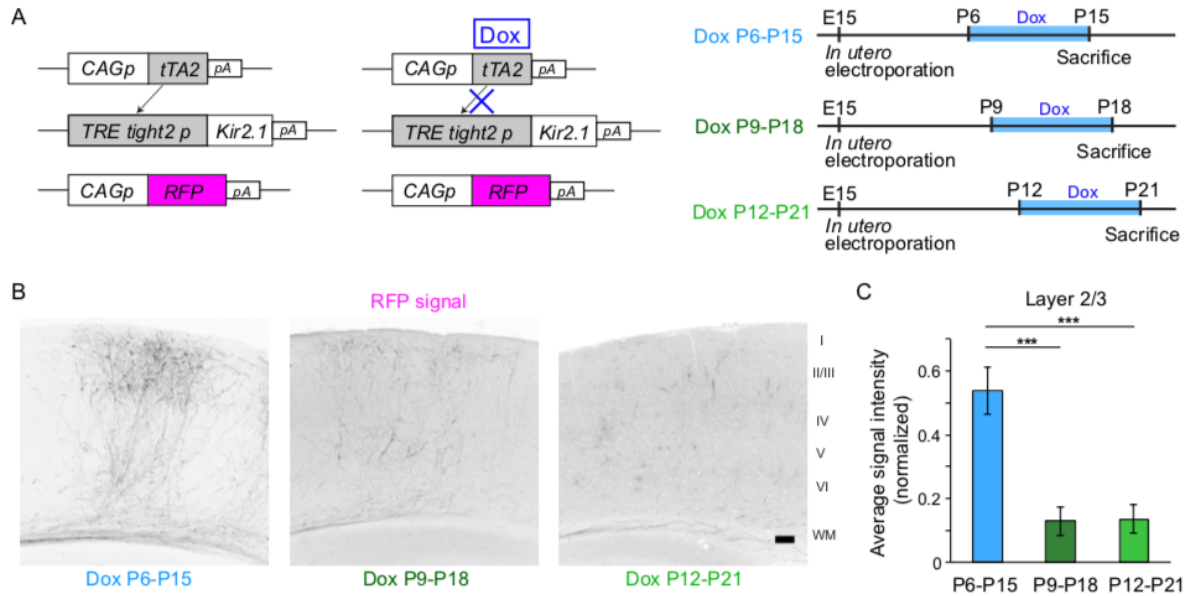

**Figure 3. A critical period for restoration of callosal axon projections.**

(A) Experimental design and timeline. pCAG-tTA2s and pTRETight2-Kir2.1 plasmids were transfected at E15, and Dox was administered from P6 to P15, from P9 to P18, or from P12 to P21.

(B) Fluorescently labeled callosal axon projections in the P15 cortex. Scale bar, 100 micrometers.

(C) Average signal intensity of fluorescently labeled callosal axons in layers 1-3. “Dox P6-P15” group: n = 10 sections from 10 mice. “Dox P9-P18” group: n = 9 sections from 9 mice. “Dox P12-P21” group: n = 10 sections from 10 mice. \*\*\*, p < 0.001 by Tukey-Kramer test.

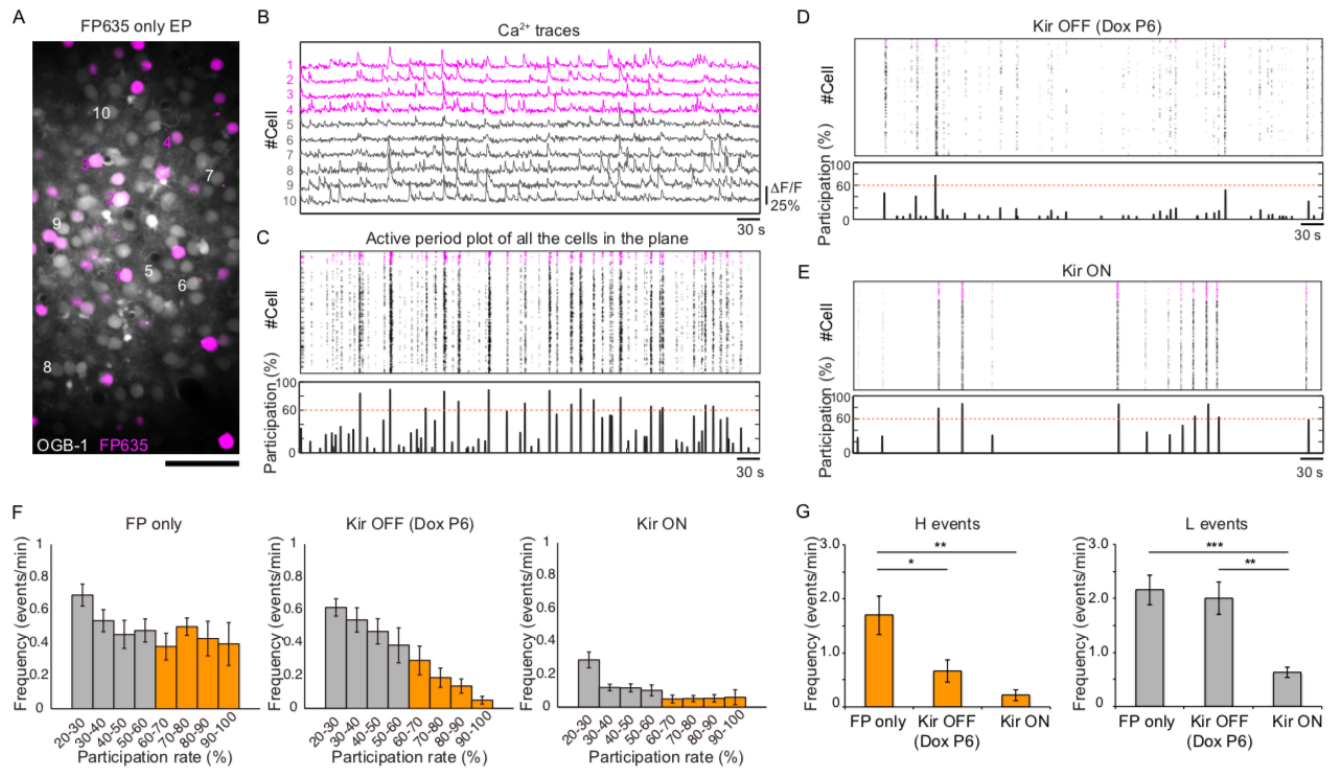

**Figure 4. Partial restoration of synchronous activity revealed by in vivo two-photon  $Ca^{2+}$  imaging.**

(A) A representative image of OGB1-loaded (gray) and FP635-expressing (magenta) neurons in the P13 mouse visual cortex obtained by two-photon microscopy. Scale bar: 50 micrometers. Numbers shown in the image correspond to the cell numbers shown in panel (B).

(B)  $Ca^{2+}$  traces from representative FP635+ (#1-4) and FP635- (#5-10) neurons. Obtained from the same recording session as shown in the bottom panel.

(C) Top: an active period plot of all identified FP635+ (magenta) and FP635- (black) neurons in the top image. Bottom: corresponding participation rate. Events with a participation rate above 60% were regarded as H events.

(D) A representative active period plot and corresponding participation rate from a Tet-Kir2.1 with Dox mouse. Because of Dox treatment from P6, Kir2.1 expression was suppressed from P6: Kir OFF.

(E) A representative active period plot and corresponding participation rate from a Tet-Kir2.1 without Dox mouse. Because of the absence of Dox, Kir2.1 was expressed throughout development: Kir ON.

(F) Histograms of synchronous activity frequency with different participation rates from FP635-electroporated (Top: FP only), Tet-Kir2.1 with Dox (Middle: Kir OFF Dox P6), and Tet-Kir2.1 without Dox (Bottom: Kir ON) mice.

(G) Quantifications of H (>60%) and L (20-60%) events. FP only, 5 mice. Kir OFF (Dox P6), 5 mice. Kir ON, 5 mice. \*;  $p < 0.05$ , \*\*;  $p < 0.01$ , \*\*\*;  $p < 0.001$  by Tukey-Kramer test.

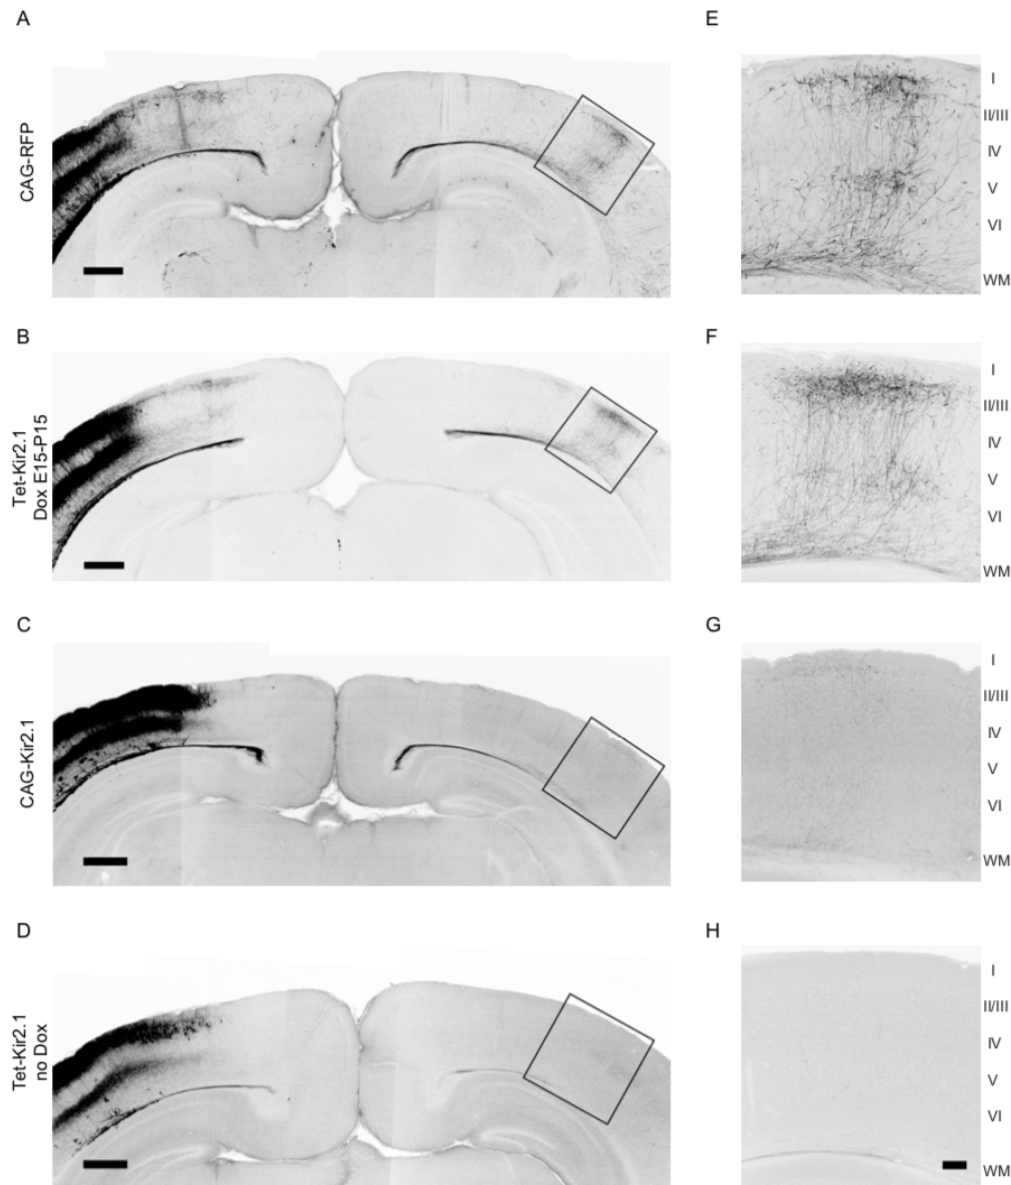

**Supplementary Figure 1. Callosal axon projections with or without activity manipulation.**

(A, E) Coronal sections through the P15 visual cortex show the distribution of neurons expressing fluorescent proteins on the electroporated side and their axonal projections on the other side. pCAG-TurboRFP was transfected to label callosal axons.

(B, F) pTRE-Tight2-Kir2.1, pCAG-tTA2<sup>s</sup>, and pCAG-TurboRFP were transfected, and Dox was administered from E15 to P15. Due to the presence of Dox, Kir2.1 expression is suppressed throughout development.

(C, G) pCAG-Kir2.1 and pCAG-TurboRFP were transfected. Under the control of the CAG promoter, Kir2.1 is expressed throughout development.

(D, H) pTRE-Tight2-Kir2.1, pCAG-tTA2<sup>s</sup>, and pCAG-TurboRFP were transfected, and Dox was not administered. Due to the absence of Dox, Kir2.1 is expressed throughout development. Scale bars in A-D, 500 micrometers. Scale bar in H, 100 micrometers.

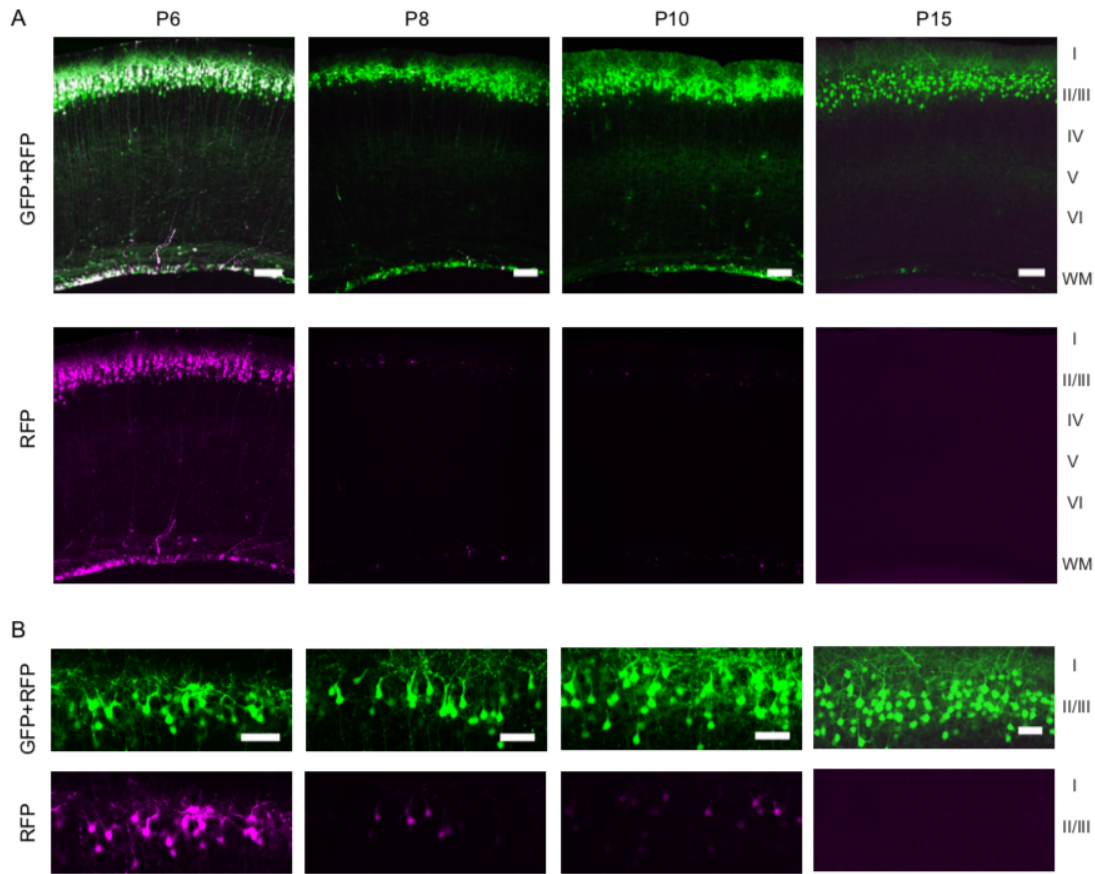

**Supplementary Figure 2. Validation of the Tet-off system.**

(A, B) pCasal-EGFP, pTRE-Tight2-TurboRFP, and pCAG-tTA2<sup>s</sup> were transfected, and Dox was administered from P6 to P15. Top panels in (A) show EGFP and TurboRFP signals. Bottom panels in (A) show TurboRFP signals. Note the rapid disappearance of TurboRFP signals after Dox administration. In (B), EGFP and TurboRFP signals in layer 2/3 are shown. Scale bars in (A), 100 micrometers. Scale bars in (B), 50 micrometers.
