1  
2  
3 **Developmental stage-specific spontaneous activity contributes to callosal axon projections**

4  
5 Yuta Tezuka<sup>1#</sup>, Kenta M. Hagihara<sup>2,3#</sup>, Kenichi Ohki<sup>2,4,5,6,8</sup>, Tomoo Hirano<sup>1</sup>, and Yoshiaki Tagawa<sup>1,7,8\*</sup>

6  
7 <sup>1</sup> Department of Biophysics, Kyoto University Graduate School of Science, Kitashirakawa-Oiwake-cho,  
8 Sakyo-ku, Kyoto 606-8502, Japan

9 <sup>2</sup> Department of Molecular Physiology, Kyushu University Graduate School of Medical Sciences, 3-1-1,  
10 Maidashi, Higashi-Ku, Fukuoka 812-8582, Japan

11 <sup>3</sup> Friedrich Miescher Institute for Biomedical Research, Basel 4058, Switzerland

12 <sup>4</sup> Department of Physiology, The University of Tokyo School of Medicine, Tokyo 113-0033, Japan,

13 <sup>5</sup> International Research Center for Neurointelligence (WPI-IRCN), The University of Tokyo School of Medicine,  
14 Tokyo 113-0033, Japan,

15 <sup>6</sup> Institute for AI and Beyond, The University of Tokyo School of Medicine, Tokyo 113-0033, Japan

16 <sup>7</sup> Department of Physiology, Graduate School of Medical and Dental Sciences, Kagoshima University, Kagoshima  
17 890-8544, Japan

18 <sup>8</sup> CREST, Japan Science and Technology Agency, Kawaguchi, Saitama 332-0012, Japan

19 # Equally contributed

20 \*Correspondence to: Yoshiaki Tagawa (tagawa@m.kufm.kagoshima-u.ac.jp)

21

22

23

14

15 **Abstract**

16 The developing neocortex exhibits spontaneous network activity with various synchrony levels, which has been  
17 implicated in the formation of cortical circuits. We previously reported that the development of callosal axon  
18 projections, one of the major long-range axonal projections in the brain, is activity dependent. However, what sort of  
19 and when activity is indispensable are not known. Here, using a genetic method to manipulate network activity in a  
20 stage-specific manner, we demonstrated that network activity contributes to callosal axon projections in the mouse  
21 visual cortex during a “critical period”: restoring neuronal activity during that period resumed the projections, whereas  
22 restoration after the period failed. Furthermore, in vivo  $\text{Ca}^{2+}$  imaging revealed that the projections could be established  
23 even without fully restoring highly synchronous activity. Overall, our findings suggest that the spontaneous network  
24 activity is selectively required during a critical developmental time window for the formation of long-range axonal  
25 projections in the cortex. (150)

16

17

18

19

## 10 Introduction

11           Neuronal activity plays a role in the formation of neural circuits in the brain (Katz and Shatz, 1996; Spitzer,  
12 2006; Ackman and Crair, 2014). The roles of sensory-driven and spontaneously generated neuronal activity in circuit  
13 formation are well documented in the mammalian visual system (Wong, 1999; Huberman et al., 2008). Retinal  
14 ganglion cells, output neurons in the retinal circuit, exhibit spontaneously generated, highly correlated neuronal  
15 activity (called retinal waves) before photoreceptor cells develop (Galli and Maffei, 1988; Meister et al., 1991; Wong  
16 et al., 1993). Such activity is transmitted to the lateral geniculate nucleus and the superior colliculus, where it plays an  
17 instructive role in the formation and reorganization of neuronal connections (Penn et al., 1998; Stellwagen and Shatz,  
18 2002; Pfeiffenberger et al., 2005; Chandrasekaran et al., 2005; Hooks and Chen, 2006). The connectivity once formed  
19 is further sculpted by sensory-driven neuronal activity after visual inputs are available (Hooks and Chen, 2006).

20           The developing cerebral cortex also exhibits robust spontaneous network activity, ranging from highly  
21 synchronous to less correlated patterns (Siegel et al., 2012). This is partly generated intracortically and partly  
22 originates from retinal waves (Siegel et al., 2012; Gribizis et al., 2019; Smith et al., 2018). In rodents, a highly  
23 synchronous pattern of spontaneous neuronal activity emerges during early postnatal periods when cortical neurons  
24 still undergo maturation and circuit formation (Garaschuk et al., 2000; Allene et al., 2008; Yang et al., 2009; Siegel et  
25 al., 2012). Such activity indicates a heterogeneous traveling pattern in the developing cortex (Garaschuk et al., 2000;  
26 Ackman et al., 2012; Hagihara et al., 2015). Subsequently, a more desynchronized pattern becomes dominant  
27 (Rocheffort et al., 2009; Golshani et al., 2009). Based on findings in the visual system and other systems, these patterns  
28 of activity have been thought to play important roles in the development of cortical circuits (Khazipov and Luhmann,  
29 2006; Blankenship and Feller, 2010; Winnubst et al., 2015; Hagihara et al., 2015; Nakazawa et al., 2020). However,  
30 their role in many aspects of cortical circuit formation remains to be fully elucidated.

31           The callosal axon projection, a long-range axonal projection connecting the two cortical hemispheres, is  
32 essential for integrating information processed in the hemispheres (Hubel and Wiesel, 1967). It is important for higher  
33 cognitive functions and its alterations have been noted in patients with developmental disorders (Paul, 2011). It has  
34 been a good model for studying activity-dependent mechanisms of cortical circuit formation (De León Reyes et al.,  
35 2020). Callosal axons derived from layer 2/3 callosal projection neurons in one hemisphere project to the other  
36 hemisphere through several successive stages by postnatal day 15 (P15) in mice (Mizuno et al., 2007; Wang et al.,  
37 2007; Tagawa and Hirano, 2012). This axonal projection is activity-dependent: several groups, including ours, have  
38 previously shown that exogenous expression of Kir2.1 (an inward rectifying potassium channel), a genetic method to  
39 reduce neuronal activity (Johns et al., 1999), impairs callosal axon projection (Mizuno et al., 2007; Wang et al., 2007;  
40 Suarez et al., 2014; Rodriguez-Tornos et al., 2016). Interestingly, when we expressed Kir2.1 in only a small number of  
41 neurons and examined the cell-autonomous effect of activity reduction on their axonal projections, we observed that  
42 the effect was less than that when we expressed Kir2.1 in a larger number of neurons (Mizuno et al., 2010). We also  
43 found that Kir2.1 expression in a large number of neurons reduced not only the activity of individual neurons (Mizuno  
44 et al., 2007) but also spontaneous network activity in the cortex during early postnatal periods (Hagihara et al., 2015).  
45 As mentioned above, the pattern of spontaneous cortical network activity changes during the period when callosal  
46 axons undergo maturation processes. These results led us to assume that there might be a specific temporal window in

77 which cortical network activity is indispensable for the formation of long-range axonal projections of callosal neurons.

78 In this report, we sought to determine what sort of and when activity is indispensable for callosal axon  
79 projections. To this end, we used genetic methods to reduce and restore spontaneous network activity in a  
80 stage-specific manner in the developing mouse cortex.

81

## 82 Results

### 83 Callosal axons require neuronal activity during P6-15 for their projection

84 In the visual cortex, callosal axons project densely to a narrowly restricted region at the border between the  
85 primary and secondary visual cortex, in which they terminate primarily in layer 2/3 and less so in layer 5 (Olavarria  
86 and Montero, 1984; Mizuno et al., 2007; Figure 1-figure supplement 1). This region- and lamina-specific projection  
87 pattern forms by P15 in the mouse (Mizuno et al., 2007). Our group, as well as others, previously showed that Kir2.1  
88 expression disturbs callosal axon development primarily in the second postnatal week (Tagawa and Hirano, 2012). We  
89 also reported that Kir2.1 expression strongly reduced spontaneous cortical network activity at P9-10 and P13-14  
90 (Hagihara et al., 2015). These results suggest that network activity around the second postnatal week is involved in the  
91 formation of callosal axon projections. In the current study, we sought to confirm this by conducting “rescue”  
92 experiments, in which we attempted to restore the activity during P6-15 and asked whether such restored activity  
93 could recover the axonal projections.

94 To control spontaneous network activity in a stage-specific manner during early postnatal periods, we used  
95 the Tet-off system to express Kir2.1. In this system, Kir2.1 was expressed without doxycycline (Dox) treatment, and  
96 Kir2.1 expression was suppressed in response to Dox treatment (Figure 1A). Using in utero electroporation, we  
97 transfected layer 2/3 cortical neurons with two expression vectors (pTRE-Tight2-Kir2.1 and pCAG-tTA2<sup>s</sup>) for the  
98 expression of Kir2.1, together with an RFP expression vector (pCAG-TurboRFP) for labeling callosal axon  
99 projections (Figure 1; Mizuno et al., 2007; Hagihara et al., 2015).

100 To test the feasibility of the Tet-off system, we divided the electroporated mice into two groups. We reared  
101 the first group of mice without Dox treatment throughout development (n=7 mice). Under this condition, we observed  
102 that RFP-labeled callosal axon projections were impaired at P15 (Figure 1B, Figure 1- figure supplement 1), a pattern  
103 similar to that observed when we expressed both Kir2.1 and a fluorescent protein under the control of the CAG  
104 promoter (Mizuno et al., 2007; Figure 1- figure supplement 1). This suggests that Kir2.1 expression using the Tet-off  
105 system is as effective as that using the CAG promoter. We then reared the second group with Dox throughout  
106 development (from E15 to P15; see Methods: n=8 mice). Under this condition, we observed that RFP-labeled callosal  
107 axons projected normally to the contralateral cortex in a region- and lamina-specific manner at P15 (Figure 1B, Figure  
108 1- figure supplement 1). This projection pattern was similar to the pattern observed when we expressed only a  
109 fluorescent protein (i.e., normal pattern of callosal projections: Mizuno et al., 2007; Figure 1- figure supplement 1),  
110 suggesting that Dox treatment effectively suppressed Kir2.1 expression throughout development.

111 The aim of this study was to determine the role of neuronal activity during P6-15. Therefore, we used the  
112 same set of plasmids for in utero electroporation and began Dox treatment during the postnatal period. Dox treatment  
113 for 4 days was almost enough to suppress gene expression in the Tet-off system (Figure 1-figure supplement 2, 3;

14 regarding the apparent low-level expression of Kir2.1EGFP after Dox treatment, please see the legend of Figure 1-  
15 figure supplement 3). We started Dox treatment from P6 and continued it until P15 (n=10 mice). Under this condition,  
16 we observed that RFP-labeled callosal axons reached the innervation area in the contralateral cortex and ramified in a  
17 laminar specific manner at P15 (Figure 1B, C). This projection pattern appeared comparable to the normal pattern of  
18 callosal axon projections (Figure 1B, C). Because reaching and ramifying in layers 2/3 is a critical developmental step  
19 for the formation of callosal axon projections (Mizuno et al., 2007; Wang et al., 2007; Tagawa and Hirano, 2012), we  
20 quantified the strength of RFP signals in layers 2/3. Quantitative analyses suggested that the density of RFP-labeled  
21 callosal axons arriving and ramifying in the target cortical layer (see Methods) was comparable between the Dox  
22 P6-15 and Dox E15-P15 groups (p=0.96, Tukey-Kramer test: Figure 1D) and that it was greater in the Dox P6-15  
23 group than in the no Dox group (p=2.3 x 10<sup>-3</sup>, Tukey-Kramer test: Figure 1D). Analyses of the width of callosal axon  
24 innervation zone, as well as densitometric line scans across all cortical layers, suggest that callosal axons reach and  
25 ramify in layers 2/3 in Dox P6-15 mice (Figure 1- figure supplement 4). Thus, Dox treatment at P6-15, which likely  
26 shut off Kir2.1 expression from P8-10 to P15, was effective for the formation of callosal axon projections, implying  
27 that callosal axons require neuronal activity during P6-15 to form their projections.

28 An important role of neuronal activity in P10-15 was suggested by another experiment using the DREADD  
29 (Designer Receptors Exclusively Activated by Designer Drugs) method. DREADD is a method to increase or decrease  
30 neuronal activity using a nonendogenous ligand clozapine-N-oxide (CNO) (Alexander et al., 2009). Activation of  
31 hM3DGq, one of the artificial G-protein-coupled receptors used in DREADD technology, in hippocampal neurons  
32 causes depolarization of the membrane potential, resulting in an increase in neuronal activity (Alexander et al., 2009).  
33 We transfected layer 2/3 cortical neurons with the expression vector pCAG-hM3DGq, together with the  
34 pCAG-TurboRFP and pCAG-Kir2.1 plasmids, by in utero electroporation at E15 (Figure 2A). We observed that the  
35 electroporated mice with daily CNO injections from P10-14 (n=11 mice) exhibited a region- and lamina-specific  
36 projection pattern of RFP-labeled callosal axons in the contralateral cortex (Figure 2B). Neither of the two control  
37 groups of mice (n=10 mice for Kir2.1+hM3DGq with saline injection P10-14, n=4 mice for Kir2.1 with CNO  
38 injection P10-14) exhibited such axonal projections (Figure 2B, data not shown). Quantitative analyses suggested a  
39 partial but significant “rescue” effect of hM3DGq expression with CNO injections against the effect of Kir2.1  
40 expression on callosal axon projections (Figure 2C). These results suggest that the resumption of neuronal activity  
41 during P10-15 is effective for the formation of callosal axon projections.

42

### 43 A critical period for the formation of callosal projections

44 Callosal axons from Kir2.1-expressing neurons arrive in the white matter of the target innervation areas  
45 around P5, the same time as normal callosal axons (Mizuno et al., 2007). Afterwards, they exhibit retarded and  
46 eventually stalled growth and development. As shown above, callosal axons can form region- and lamina-specific  
47 projection patterns when their activity is resumed from P6. How long do they retain the ability to grow into the target  
48 cortical areas and make lamina-specific branches after reaching the target innervation areas around P5? We found that  
49 the region- and lamina-specific projection pattern of callosal axons could not be recovered when Dox treatment was  
50 started later than P9. We performed in utero electroporation with the same set of plasmids as before (Figures 1A, 3A),

started Dox treatment from P9 or P12, and then assessed callosal axon projections at P18 or P21 (n=9 mice for Dox treatment P9-18; n=10 mice for Dox treatment P12-21). Contrary to the result of Dox treatment during P6-15, callosal axons were not present in the target innervation areas in either group of mice (Figure 3B). The extent of callosal axons arriving and ramifying in the target cortical layer (see Methods) was significantly lower in the Dox P9-18 and Dox P12-21 groups than in the Dox P6-15 group (Dox P9-18 vs Dox P6-15,  $p=1.0 \times 10^{-4}$ ; Dox P12-21 vs Dox P6-15,  $p=9.0 \times 10^{-5}$ , Tukey-Kramer test: Figure 3C). These observations suggest that callosal axons retain the ability to grow into the target innervation areas and make lamina-specific branches only for a limited period during development.

### Network activity contributing to callosal axon projections

It has been shown that spontaneous network activity frequently occurs in the early postnatal cerebral cortex. Such network activity can be classified as a highly synchronous pattern (H events) or a less correlated pattern (L events) (Siegel et al., 2012). In the visual cortex, these events are mechanistically distinct (Siegel et al., 2012): H events are mostly of cortical origin, whereas L events are driven by activity in the retina. They may have distinct roles in cortical circuit formation (Cheyne et al., 2019; Wosniack et al., 2021). To gain insight into what pattern(s) of network activity contribute to activity-dependent axonal projections, we recorded spontaneous neuronal activity in V1 at P13 using in vivo two-photon  $\text{Ca}^{2+}$  imaging with a calcium indicator OGB1 (Figure 4A). Consistent with a previous study (Hagihara et al., 2015), control mice (in which the fluorescent protein FP635 was electroporated: n = 5 mice) exhibited frequent spontaneous network events during 10-minute recording sessions (Figure 4B, C), whereas Kir2.1-expressing mice exhibited substantially fewer network events (n=5 mice, Figure 4E). Notably, both Kir2.1-positive and Kir2.1-negative neurons were suppressed. We classified these network events based on a similar criterion to that used in a previous study (Siegel et al., 2012, see Methods): H events, highly synchronous network activity with a participation rate > 60%; L events, less correlated events with a participation rate of 60-20%. We observed both patterns of network activity in control mice at P13 (Figure 4F) (H events,  $1.70 \pm 0.36$  events/min; L events,  $2.16 \pm 0.27$  events/min), and Kir2.1 expression significantly reduced both of them (Figure 4F) (H events,  $0.21 \pm 0.10$  events/min; L events,  $0.62 \pm 0.09$  events/min; H events,  $p=1.2 \times 10^{-3}$ ; L events,  $p=8.1 \times 10^{-4}$  by Tukey-Kramer test).

We then asked whether the network activity would be resumed in the condition where callosal axon projections were recovered (i.e., Kir2.1 expression was turned off beginning from P6). We started Dox treatment on P6 and recorded spontaneous neuronal activity in the electroporated mice at P13 (n = 5 mice). We found that Dox treatment from P6 resumed cortical network activity at P13 (Figure 4D). Unexpectedly, this treatment almost recovered L events, whereas H events were not recovered (H events,  $0.66 \pm 0.21$  events/min; L events,  $2.01 \pm 0.30$  events/min; Figure 4G). L events may make a larger contribution to the formation of callosal axon projections, although the involvement of H events or the total frequency of activity cannot be ruled out. Collectively, our observations suggest that sufficiently high activity during P6-15 plays a role in the formation of region- and lamina-specific projection patterns of callosal axons.

### Discussion

38 In this study, using a genetic method to reduce and restore spontaneous network activity in the early  
39 postnatal cerebral cortex, we demonstrated that spontaneous activity during P6-15 contributes to the formation of  
40 region- and lamina-specific projection patterns of callosal axons. Several previous studies have revealed important  
41 roles of spontaneous cortical activity in the fine-tuning of local circuits and neural function (Winnubst et al., 2015;  
42 Hagihara et al., 2015; Wosniack et al., 2021). Our findings add new evidence of the critical role of spontaneous  
43 network activity in cortical circuit formation and demonstrate that not only local circuits but also long-range axonal  
44 projections require spontaneous activity for their normal development.

45 A recent study showed that a developmental change in the firing mode of callosal projection neurons,  
46 regulated by transcription factor Cux1-driven Kv1 channel expression, was critically involved in activity-dependent  
47 callosal axon projections (Rodriguez-Tornos et al., 2016). Because they assessed the firing property of neurons using  
48 in vitro slice preparations, what aspect(s) of activity in vivo contribute to axonal projection is not known. Our study  
49 extends their findings by demonstrating that spontaneous activity in vivo is critical for callosal axon projections.

50 The “rescue” effect was only observed during P6-15 but not afterwards (Figure 3). A similar developmental  
51 time window for the formation of axonal projections was reported in the olfactory system (Ma et al., 2014). In the  
52 previous study, we showed that callosal axons could reach the innervation area almost normally under  
53 activity-reduction, and that the effects of activity-reduction became apparent afterwards (Mizuno et al., 2007).  
54 Callosal axons elaborate their branches extensively in P10-P15 (Mizuno et al., 2010), and axon branching is regulated  
55 by neuronal activity (Matsumoto and Yamamoto, 2016). It is likely that activity is required for the processes of  
56 formation, rather than the maintenance of the connections already formed by P10, but the current study employed  
57 massive labeling of callosal axons which is not suited to clarify this. In addition, the restoration of activity in the  
58 Tet-off (Figure 1) or DREADD (Figure 2) experiment may not completely rescue the ramification pattern of  
59 individual axons. Single axon tracing experiments (Mizuno et al., 2010; Dhande et al., 2011) would be required to  
60 clarify this. Nonetheless, our findings suggest that callosal axons retain the ability, or are permitted, to grow and make  
61 region- and lamina-specific projections in the cortex during a limited period of postnatal cortical development under  
62 an activity-dependent mechanism.

63 Patterned spontaneous activity in the developing neocortex can be classified as a highly synchronous  
64 pattern (H events) and a less correlated pattern (L events) (Siegel et al., 2012). What could be the roles of these  
65 patterns of activity in axonal projections? In retinothalamic and retinocollicular projections, network activity in the retina  
66 (retinal waves) is proposed to provide spatial information for axonal projections. It is proposed that two adjacent  
67 retinal ganglion cells (RGCs), which likely fire together in a spontaneous network event, would project their axons to  
68 an adjacent location in the target tissue. On the other hand, two RGCs located distantly, or even in the left and right  
69 eyes, are unlikely to fire together, projecting axons to distinct locations (Wong, 1999). The highly synchronous  
70 network activity in the cortex recruits more than 60% of neurons in an imaging field, clearly exceeding the proportion  
71 of callosal projection neurons. Callosal projection neurons are intermingled with other types of cortical neurons that  
72 project axons intracortically (Mitchell and Macklis, 2005), suggesting that both the former and the latter contribute to  
73 H events once they occur. If the highly synchronous activity in the cortex exerts a similar role as retinal waves, it may  
74 provide topographic information to callosal axons and other axons projecting to other cortical regions at the same

15 time.

16 We have shown that the projections could be established even without fully restoring highly synchronous  
17 activity (Figure 4). L events, but not H events, were present in P13 cortex after Dox treatment at P6. L events may be  
18 sufficient for the formation of callosal projections. Alternatively, any form of activity with certain level(s) (i.e.,  
19 “sufficiently” high activity with no specific pattern) could be permissive for the formation of callosal connections. In a  
20 recent study, we showed that callosal projection neurons preferentially make synaptic connections with neighboring  
21 callosal projection neurons and form local subnetworks (Hagihara et al., 2020). Some of the L events observed in this  
22 study may reflect the correlated subnetwork activity of callosal projection neurons, and such correlated activity may  
23 be critical for their axonal projections. This consideration may lead to a more general and intriguing idea that L events  
24 might be coactivations of locally connected cortical neurons, sending axons to the same target region(s). Future  
25 experiments would be able to test this important possibility by combining retrograde labeling of callosal (and other  
26 projection) neurons and Ca<sup>2+</sup> imaging in developing mice.

27 Network activity may also function to induce some trophic factors. If this is the case, the effect of reducing  
28 the activity of a small number of cells could be less than that of global activity reduction (Mizuno et al, 2010) because  
29 surrounding unperturbed cells can supply a “trophic factor” for the perturbed cells. Spitzer et al. showed that BDNF  
30 could exert such a function in Xenopus spinal neurons (Guemez-Gamboa et al., 2014). They showed that spontaneous  
31 firing causes the release of BDNF, which non-cell-autonomously functions to trigger TrkB receptor activation and  
32 activity-dependent transmitter switching in the surrounding neurons. BDNF may function in callosal axon projections.  
33 BDNF expression is activity-dependent in the cortex (Tao et al., 1998; Lein and Shatz, 2000). It has also been shown  
34 that callosal axons require BDNF secretion for their projections (Shimojo et al., 2015). Activity-dependent secretion of  
35 BDNF, or other factor(s), may be associated with the network activity.

36 Highly and/or less synchronous activity can be instructive or permissive to the formation of cortical circuits.  
37 As mentioned above, L events may be a mixture of different patterns of activity with mixed populations of neurons in  
38 the cortex. Some pattern(s) of network activity embedded in L events may play a role in the formation of callosal  
39 projections and cortical connections in general.

## 40 **Acknowledgements**

41 We thank T. Kitazawa (FMI) for reading and commenting on the manuscript; T. Murakami (U.Tokyo / Kyushu Univ.)  
42 for the help in calcium imaging data analysis validation; All the members of Tagawa, Hirano, and Ohki laboratories  
43 for discussion.

## 44 **Funding**

45 Core Research for Evolutionary Science and Technology (CREST) - Japan Science and Technology Agency (JST) (to  
46 K.O. and Y. Tagawa); Brain Mapping by Integrated Neurotechnologies for Disease Studies (Brain/MINDS)-Japan  
47 Agency for Medical Research and Development (AMED) (to K.O.); Institute for AI and Beyond (to K.O.); Japan  
48 Society for Promotions of Sciences (JSPS) KAKENHI (Grant numbers 25221001, 25117004, 19H01006, and  
49 19H05642 to K.O.; 23500388 and 16 K06992, and 21K06374 to Y. Tagawa); “Neural Diversity and Neocortical



62 Organization” (23123508 and 25123707 to Y. Tagawa); “Dynamic Regulation of Brain Function by Scrap & Build  
63 System” (17H05745 and 19H04756 to Y. Tagawa); Astellas Foundation for Research on Metabolic Disorders (to Y.  
64 Tagawa); The Kodama Memorial Fund for Medical Research (to Y. Tagawa); The Novartis Foundation (Japan) for the  
65 Promotion of Science (to Y. Tagawa); The Uehara Memorial Foundation (to Y. Tagawa); Takeda Science Foundation  
66 (to K.M.H).

67

#### 68 **Author Contributions**

69 Y. Tezuka, K.M.H. and Y. Tagawa initially conceived and designed the research. Y. Tezuka and Y. Tagawa performed  
70 histological experiments and analyzed the data. T.H. supervised experiments, data analysis, and interpretation of the  
71 data. K.M.H. performed imaging experiments and analyzed the data. K.O. supervised imaging experiments, data  
72 analysis, and interpretation of the data. K.M.H., and Y. Tagawa prepared the figures and wrote the manuscript. Y.  
73 Tezuka, K.O. and T.H. commented on the manuscript.

## 74 **Experimental Procedures**

### 75 Mice

76 The ICR strain of mice was used. In utero electroporation was performed in pregnant female mice, and their offspring  
77 (both male and female) were used in the study. All experiments were performed in accordance with the institutional  
78 animal welfare guidelines of the Animal Care and Use Committee of Kyoto University, Kyushu University and  
79 Kagoshima University and were approved by the Committee of Animal Experimentation in the Graduate School of  
80 Science, Kyoto University, Graduate School of Medical and Dental Sciences, Kagoshima University, and the Ethical  
81 Committee of Kyushu University.

82

### 83 In utero electroporation and plasmids

84 In utero electroporation was performed as previously described (Mizuno et al., 2007; Hagihara et al., 2015). Briefly,  
85 pregnant mice were anesthetized at E15.5 with somnopentyl (pentobarbital sodium; 50 mg per kg of body weight;  
86 Kyoritsu-seiyaku) in saline with or without isoflurane. A midline laparotomy was performed to expose the uterus. For  
87 DNA microinjection, glass capillary tubes (GD-1; Narishige) were pulled using a micropipette puller (Sutter  
88 Instruments). Embryos were injected into the lateral ventricle with 1 microliter of DNA solution (expression plasmids  
89 other than pCAG-tTA2<sup>s</sup>, 0.6-1.0 mg ml<sup>-1</sup>; pCAG-tTA2<sup>s</sup>, 0.04-0.1 mg ml<sup>-1</sup>), and square electric pulses (50 V; 50 ms)  
90 were delivered five times at the rate of one pulse per second using an electroporator (CUY21EDIT; NepaGene). After  
91 electroporation, the uterus was repositioned, the abdominal cavity was filled with prewarmed PBS, and the wall and  
92 skin were sutured. Animals were allowed to recover on a heating pad for approximately an hour before returning to  
93 their home cage. Plasmids used were as follows. pCAG-tTA2<sup>s</sup> and pTRETight2-Kir2.1 express Kir2.1 under the  
94 control of the Tet-off gene expression system (Hagihara et al., 2015). pCasal-EGFP pCAG-TurboRFP, pCAG-FP635  
95 express fluorescent proteins and pCAG-Kir2.1 for the expression of Kir2.1 under the control of the CAG promoter  
96 (Mizuno et al., 2007). pTRETight2-TurboRFP for expression of the fluorescent protein under the control of the Tet-off  
97 gene expression system. pTRETight2-Kir2.1EGFP (EGFP was fused with the C terminus of Kir2.1) was used to  
98 confirm the expression of Kir2.1. pCAG-hM3DGq for DREADD experiments. After birth, animals that did not show  
99 fluorescent signals in the visual cortex of the electroporated hemisphere were excluded from further histological or  
100 imaging experiments. For histological analyses, animals were anesthetized at P6, P8, P10, P15, P18, or P21 with an  
101 overdose of somnopentyl and decapitated.

102

### 103 Doxycycline and clozapine N-oxide administration

104 Doxycycline (#9891; Sigma-Aldrich) was added to drinking water (2 mg ml<sup>-1</sup>) with 10% sugar. Doxycycline in water  
105 was protected from exposure to light and renewed every other day. Pups were exposed to Dox through the mother's  
106 milk; electroporated pups were transferred to a foster mother from P6 (or P9 or P12 in the experiments shown in  
107 Figure 3) that had been given Dox via the drinking water for a week. In the experiments shown in Figure 2, clozapine  
108 N-oxide (BML-NS105; Enzo Life Sciences; 1 mg ml<sup>-1</sup> in saline) was intraperitoneally injected every day. A previous  
109 study showed that an intraperitoneally injected CNO was effective (in terms of increasing activity) for about 9hrs  
110 (Alexander et al., 2009). The "partial rescue" effect we observed (Figure 2) may suggest that activity was not fully

l1 restored during 24hrs by our daily CNO injections.

l2

l3 Histology, confocal imaging, and quantification

l4 Brains were fixed using 4% paraformaldehyde in PBS overnight and then transferred to 30% sucrose in PBS for 1-2 d.

l5 Coronal brain slices (50 micrometer) were sectioned using a freezing microtome (LM2000R; Leica). Fluorescent

l6 histological images were acquired using a confocal laser-scanning microscope (FV1000; Olympus). The expression of

l7 Kir2.1EGFP was assessed with anti-GFP antibody (rat monoclonal Ab from Nacalai, Japan, GF090R; the secondary

l8 antibody, 488-anti Rat IgG from Invitrogen, A11006) (Mizuno et al., 2007). To obtain the projection patterns of

l9 fluorescently labeled callosal axons for each tissue section (50 micrometers in thickness), serial confocal images were

l10 collected at 3 micrometer intervals to create a z-axis image stack. Quantification of the callosal axon projections

l11 (Figure 1D and E) was performed as previously described with modifications (Mizuno et al., 2007). Briefly, in each

l12 brain section, boxes (300 micrometers in width, 100 micrometers in height) were drawn to enclose the fluorescently

l13 labeled callosal axon fibers in layers 1-3 and the white matter (WM) on the projection side of the cortex, and the

l14 density of the fluorescent signal in each box was computed (these are raw values of the signal intensity in layers 1-3

l15 and WM on the projection side). Then, a background level of signal was computed in adjacent areas of the cortex and

l16 subtracted (background-subtracted values of the signal intensity in layers 1-3 and WM on the projection side). To

l17 compensate for variability in the efficacy of labeling callosal axons with fluorescent proteins, the average WM

l18 fluorescent signal was obtained on the electroporated side of the cortex and used to normalize the signal intensity on

l19 the projection side of the cortex at each brain section (i.e., the normalized signal intensity in layers 1-3 and WM on the

l20 projection side was calculated by dividing the signal from layers 1-3 or WM on the projection side by the WM signal

l21 on the electroporated side; background-subtracted value of the signal intensity in layers 1-3 or WM on the projection

l22 side / background-subtracted value of the signal intensity in WM on the electroporated side). To quantify widths of

l23 callosal axon arborization in L2/3 and 5 (Figure 1- figure supplement 4A and B), confocal images were first Gaussian

l24 filtered (kernel size: 30 pixels) and then binarized by one of the authors who was blind to experimental conditions.

l25 Widths of positive regions that correspond to L2/3 and 5 arborizations in the binarized images were manually

l26 quantified. For densitometric line scans (Figure 1- figure supplement 4C), original confocal images were tilt-adjusted

l27 and cropped into 900 pixel  $\times$  900 pixel images so that pia to white matter were covered. Pixel intensities of each row

l28 of the preprocessed images, which corresponds to a cortical depth, were averaged. For KirGFP expression level

l29 quantification (Figure 1- figure supplement 3), individual neurons were manually detected and rectangular ROIs were

l30 placed. Pixel intensities in green and red channels in each ROI were then averaged. For comparison across Dox

l31 treatment conditions, the ratio between the averaged green and red channel intensities from individual neurons were

l32 used (Figure 1- figure supplement 3E).

l33

l34 Spontaneous neuronal activity recording and data analyses

l35 Mice were prepared for in vivo calcium imaging as previously described (Ohki et al., 2005; Hagihara et al., 2015). In

l36 brief, mice were anesthetized using isoflurane (3.0% for induction, 1.0%–2.0% during surgery). A custom-made metal

17 plate was mounted onto the skull, and a craniotomy was carefully performed before calcium imaging approximately  
18 above V1 using stereotaxic coordinates. After surgery, the isoflurane concentration was reduced to 0.7%. Because the  
19 level of spontaneous activity is greatly affected by the anesthesia level (Siegel et al., 2012), the isoflurane concentration  
20 was carefully controlled, and we started recording at least 1 h after the reduction in isoflurane concentration. We  
21 dissolved 0.8 mM Oregon Green 488 BAPTA-1 AM (OGB-1) in DMSO with 20% pluronic acid and mixed it with  
22 ACSF containing 0.05 mM Alexa594 (Alexa; all obtained from Invitrogen, CA, USA). A glass pipette (3–5  $\mu\text{m}$  tip  
23 diameter) was filled with this solution and inserted into the cortex around the center of a craniotomy to a depth of  
24 approximately 250  $\mu\text{m}$  from the surface, and then the solution was pressure-ejected from the pipette using a Picospitzer  
25 (Parker, US) (–0.5 psi for 1–5 s, 5–10 times). After confirming loading, the craniotomy was sealed with a cover glass.  
26 We aimed to record spontaneous neuronal activity in putative binocular zones in V1 based on relative coordinates to  
27 lambda. Since the boundaries between V1 and higher visual areas, AL/LM are not as obvious as those in adult, our  
28 recordings likely contained lateral monocular V1 and AL/LM. Changes in calcium fluorescence in the cortical neurons  
29 were monitored using a two-photon microscope (Zeiss LSM7MP or Nikon A1MP), which was equipped with a  
30 mode-locked Ti:sapphire laser (MaiTai Deep See, Spectra Physics). The excitation light was focused with a 25 $\times$   
31 Olympus (NA: 1.05) or Nikon (NA: 1.10) PlanApo objective. The average power delivered to the brain was < 20 mW,  
32 depending on the depth of focus. OGB-1 and FP635 were excited at 920 nm. The emission filters were 517–567 nm for  
33 OGB-1 and 600–650 nm for FP635. Care was taken to shield the microscope objective and the photomultipliers from  
34 stray light. Images were obtained using Zeiss Zen software or Nikon NIS Elements software. A rectangular region  
35 (281.6  $\mu\text{m}$   $\times$  140.8  $\mu\text{m}$ ) from layer 2/3 (depths of 150–300  $\mu\text{m}$  from the surface) was imaged with 512  $\times$  256 pixels at 4  
36 Hz.

37  
38 Images were analyzed using custom-written in-house software running on in MATLAB (Mathworks) (Ohki et al., 2005;  
39 Hagihara et al., 2015; <https://github.com/hagikent/CallosalRescue>). Images were motion corrected by maximizing the  
40 correlation between frames. The cell outlines were automatically identified using template matching. The identified cell  
41 outlines were visually inspected, and the rare but clear errors were manually corrected. FP635 positive or negative  
42 neurons were manually identified. The time courses of individual cells were extracted by averaging the pixel values  
43 within the cell outlines, and then, high-cut (Butterworth,  $n = 10$ ; cutoff, 1 s) and low-cut (Gaussian, cutoff, 2 min) filters  
44 were applied. Those time courses were further corrected to minimize out-of-focus signal contamination. This process is  
45 important because of the highly synchronous characteristics of spontaneous network activity during the developmental  
46 stage. To achieve this, neuropil signals were subtracted from cell body signals after multiplying the contamination ratio  
47 as previously described (Kerlin et al., 2010; Hagihara et al., 2015). The corrected fluorescence signal from a cell body  
48 was estimated as follows:

$$F_{\text{cell-corrected}}(t) = F_{\text{cell-apparent}}(t) - r \times [F_{\text{cell-surrounding}}(t) - \text{mean}(F_{\text{cell-surrounding}})]$$

30 where  $t$  is the time and  $r$  is the contamination ratio. We calculated the contamination ratio  $r$  for each cell using the least  
31 squares method as follows:

$$\{F_{\text{cell}}[t_{\text{base}}] - \text{mean}[F_{\text{cell}}(t_{\text{base}})]\} = r \times \{F_{\text{cell-surround}}[t_{\text{base}}] - \text{mean}[F_{\text{cell-surround}}(t_{\text{base}})]\}$$

33 where  $t_{\text{base}}$  is a period with no obvious spontaneous activity. After neuropil contamination correction, the spontaneous  
34 activity of each cell was detected using fixed criteria:  $\Delta F/F = 5\%$ . Time periods when  $>20\%$  cells were simultaneously  
35 active were regarded as synchronous spontaneous activity. This spontaneous activity was further classified into H events  
36 and L events (Siegel et al., 2012) based on the participation rate (H $>60\%$ ; L: 60-20%). Note that we used slightly  
37 different criteria for H and L events because of our rigid neuropil subtraction methods.

38

### 39 Statistical analyses

40 All data are expressed as individual data points and the mean  $\pm$  standard error of the mean (SEM) using a modified  
41 notBoxPlot function (originally written by R. Campbell), unless stated otherwise. Statistical analyses were conducted  
42 by R version 2.12.0 (The R Foundation for Statistical Computing). Exact p-values and additional statistical  
43 information are provided in the “Source data” (Supplementary file). Throughout the study,  $p < 0.05$  was considered  
44 statistically significant. No statistical methods were used to pre-determine sample sizes, but our sample sizes (number  
45 of animal) are similar to those generally employed in the field.

46

### 47 Figure Legends

48 Figure 1. Restoration of neuronal activity in the second postnatal week recovers callosal axon projections.

49 (A) Left, plasmids designed for temporally controlled expression of Kir2.1. Right, experimental timeline. Kir2.1 is a  
50 genetic tool to reduce neuronal activity. Transactivator tTA2<sup>s</sup> is expressed under the control of the CAG promoter  
51 (CAGp). Without doxycycline (Dox), tTA2<sup>s</sup> binds to the TRETight2 promoter (TRETight2p), and Kir2.1 expression is  
52 induced (left). With Dox administration, tTA2<sup>s</sup> cannot bind to the TRETight2 promoter, and Kir2.1 expression is  
53 suppressed (right). pA; polyA signal.

54 (B) Coronal sections through the P15 cerebral cortex show the distribution of neurons expressing fluorescent proteins  
55 on the electroporated side and their axonal projections on the other side. Top: “Dox E15-P15” condition where Dox  
56 was administered from E15 to P15; thus, Kir2.1 expression was suppressed throughout development. Middle: “Dox  
57 P6-P15” condition where Dox was administered from P6 to P15; thus, Kir2.1 expression was suppressed in the second  
58 postnatal week. Bottom: “no Dox” condition where Kir2.1 is expressed throughout development. Scale bars, 500  
59 micrometers.

60 (C) Boxed regions in (B). WM, white matter. Scale bars, 100 micrometers.

61 (D) Top, average signal intensity of fluorescently labeled callosal axons in layers 1-3. “Dox E15-P15” group:  $n = 8$   
62 sections from 8 mice. “Dox P6-P15” group:  $n = 10$  sections from 10 mice. “no Dox” group:  $n = 7$  sections from 7  
63 mice. \*\*:  $p < 0.01$  by Tukey-Kramer test. Bottom, Average signal intensity of fluorescently labeled callosal axons in the  
64 white matter. \*:  $p < 0.05$  by Tukey-Kramer test.

65

66 Figure 2. Effect of activity restoration on callosal axon projections using DREADD.

67 (A) Experimental design and timeline. Kir2.1 expression and hM3DGq expression plasmids were transfected at E15,  
68 clozapine N-oxide (CNO) or saline was injected daily from P10 to P14, and brains were fixed at P15.

69 (B) Fluorescently labeled callosal axon projections in the P15 cortex. Scale bar, 100 micrometers.

10 (C) Average signal intensity of fluorescently labeled callosal axons in layers 1-3. “Kir + hM3DGq with CNO  
11 injections” group; n = 11 sections from 11 mice. “Kir + hM3DGq with saline injections” group; n = 10 sections from  
12 10 mice. “Kir with CNO injections” group: n = 4 sections from 4 mice. “RFP” group (pCAG-TurboRFP was  
13 electroporated, no injection was performed): n = 10 sections from 10 mice. “Kir” group (pCAG-Kir2.1 was  
14 electroporated, no injection was performed): n = 7 sections from 7 mice. \*\*\*; p<0.001 by Tukey-Kramer test.

15

16 Figure 3. A critical period for restoration of callosal axon projections.

17 (A) Experimental design and timeline. pCAG-tTA2s and pTRETight2-Kir2.1 plasmids were transfected at E15, and  
18 Dox was administered from P6 to P15, from P9 to P18, or from P12 to P21.

19 (B) Fluorescently labeled callosal axon projections in the P15 cortex. Scale bar, 100 micrometers.

20 (C) Average signal intensity of fluorescently labeled callosal axons in layers 1-3. “Dox P6-P15” group: n = 10 sections  
21 from 10 mice. “Dox P9-P18” group: n = 9 sections from 9 mice. “Dox P12-P21” group: n = 10 sections from 10 mice.  
22 \*\*\*; p<0.001 by Tukey-Kramer test.

23

24 Figure 4. Partial restoration of synchronous activity revealed by in vivo two-photon Ca<sup>2+</sup> imaging.

25 (A) A representative image of OBG1-loaded (gray) and FP635-expressing (magenta) neurons in the P13 mouse visual  
26 cortex obtained by two-photon microscopy. Scale bar: 50 micrometers. Numbers shown in the image correspond to the  
27 cell numbers shown in panel (B).

28 (B) Ca<sup>2+</sup> traces from representative FP635+ (#1-4) and FP635- (#5-10) neurons. Obtained from the same recording  
29 session as shown in the bottom panel.

30 (C) Top: an active period plot of all identified FP635+ (magenta) and FP635- (black) neurons in the top image.  
31 Bottom: corresponding participation rate. Events with a participation rate above 60% were regarded as H events.

32 (D) A representative active period plot and corresponding participation rate from a Tet-Kir2.1 with Dox mouse.  
33 Because of Dox treatment from P6, Kir2.1 expression was suppressed from P6: Kir OFF.

34 (E) A representative active period plot and corresponding participation rate from a Tet-Kir2.1 without Dox mouse.  
35 Because of the absence of Dox, Kir2.1 was expressed throughout development: Kir ON.

36 (F) Histograms of synchronous activity frequency with different participation rates from FP635-electroporated (Left:  
37 FP only), Tet-Kir2.1 with Dox (Middle: Kir OFF Dox P6), and Tet-Kir2.1 without Dox (Right: Kir ON) mice.

38 (G) Quantifications of H (>60%) and L (20-60%) events. FP only, 5 mice. Kir OFF (Dox P6), 5 mice. Kir ON, 5 mice.  
39 \*; p<0.05, \*\*; p<0.01, \*\*\*; p<0.001 by Tukey-Kramer test.

40

41

42 **Figure 1-figure supplement 1.** Callosal axon projections with or without activity manipulation.

43 (A, E) Coronal sections through the P15 visual cortex show the distribution of neurons expressing fluorescent proteins  
44 on the electroporated side and their axonal projections on the other side. pCAG-TurboRFP was transfected to label  
45 callosal axons. n = 10 sections from 10 mice.

46 (B, F) pTRE-Tight2-Kir2.1, pCAG-tTA2<sup>s</sup>, and pCAG-TurboRFP were transfected, and Dox was administered from

57 E15 to P15. Due to the presence of Dox, Kir2.1 expression is suppressed throughout development. n = 8 sections from  
58 8 mice.

59 (C, G) pCAG-Kir2.1 and pCAG-TurboRFP were transfected. Under the control of the CAG promoter, Kir2.1 is  
60 expressed throughout development. n = 7 sections from 7 mice.

61 (D, H) pTRE-Tight2-Kir2.1, pCAG-tTA2<sup>s</sup>, and pCAG-TurboRFP were transfected, and Dox was not administered.  
62 Due to the absence of Dox, Kir2.1 is expressed throughout development. n = 7 sections from 7 mice. Scale bars in  
63 A-D, 500 micrometers. Scale bar in H, 100 micrometers.

64  
65 **Figure 1-figure supplement 2. Validation of the Tet-off system with fluorescent proteins.**

66 (A) pCasal-EGFP, pTRE-Tight2-TurboRFP, and pCAG-tTA2<sup>s</sup> were transfected, and Dox was administered from P6.  
67 **The blue bars indicate the period of Dox treatment. (B)** Top panels show EGFP and TurboRFP signals. Bottom panels  
68 show TurboRFP signals. Note the rapid disappearance of TurboRFP signals after Dox administration. In **(C)**, EGFP  
69 **(top panels)** and TurboRFP **(bottom panels)** signals in layer 2/3 are shown. Scale bars in (A), 100 micrometers. Scale  
70 bars in (B), 50 micrometers. P6, n = 3 sections from 3 mice. P8, n = 3 sections from 3 mice. P10, n = 3 sections from 3  
71 mice. P15, n = 2 sections from 2 mice.

72  
73 **Figure 1-figure supplement 3. Validation of the Tet-off system with Kir2.1EGFP.**

74 (A) pCAG-TurboRFP, pTRE-Tight2-Kir2.1EGFP, and pCAG-tTA2<sup>s</sup> were transfected. (B) Dox was administered from  
75 P6. The blue bars indicate the period of Dox treatment. (C) Kir2.1EGFP (Kir-GFP) and TurboRFP (RFP) signals in P6,  
76 P10, and P15 cortical sections. Right panels show three representative neurons with Kir-GFP and RFP signals at each  
77 age. At P6 (before Dox treatment), the signals of Kir-GFP (stained with anti-GFP antibody) were observed in the  
78 periphery of the soma and along dendrites, implying that Kir-GFP was transported to the cellular membrane. Note that  
79 RFP signals were localized in the central part of the cell body. At P10 and P15 (4 days and 9 days after Dox treatment),  
80 Kir-GFP signals were not observed in the periphery of the soma and along dendrites; however, low-level signals were  
81 observed in the central part of the cell body. These may suggest low-level expression of Kir-GFP even after Dox  
82 treatment. Alternatively, these may reflect the contaminated RFP signals in the acquisition of the GFP channel. (D)  
83 Average signal intensity of Kir-GFP (X axis) and RFP (Y axis) in each cell is displayed at P6, P8, P10, P12, and P15.  
84 (E) Each dot represents KirGFP / RFP ratio of a cell at each age. Note that KirGFP / RFP ratio decreases after Dox  
85 administration at P6. Scale bar in the left panel of C, 50 micrometers; right panel, 10 micrometers. P6, n = 10 sections  
86 from 3 mice. P8, n = 7 sections from 2 mice. P10, n = 10 sections from 3 mice. P12, n = 10 sections from 3 mice. P15,  
87 n = 10 sections from 3 mice.

88  
89 **Figure 1-figure supplement 4. The width and laminar distribution of callosal axon projections.**

90 (A, B) The width of callosal axon innervation zone in layers 2/3 (A) and 5 (B). “Dox E15-P15” group: n = 8 sections  
91 from 8 mice. “Dox P6-P15” group: n = 9 sections from 9 mice. “no Dox” group: n = 7 sections from 7 mice. “RFP”  
92 group: n = 7 sections from 7 mice.

93 (C) Densitometric line scans of fluorescence intensity across all cortical layers. “Dox E15-P15” group: n = 8 sections

14 from 8 mice. “Dox P6-P15” group: n = 9 sections from 9 mice. “no Dox” group: n = 7 sections from 7 mice. “RFP”  
15 group: n = 7 sections from 7 mice.  
16  
17



## 18 **References**

- 19 Ackman, J.B., Burbridge, T.J., and Crair, M.C. (2012). Retinal waves coordinate patterned activity throughout the  
20 developing visual system. *Nature* 490, 219-225.
- 21
- 22 Ackman, J.B., and Crair, M.C. (2014). Role of emergent neural activity in visual map development. *Curr Opin*  
23 *Neurobiol* 24, 166-175.
- 24
- 25 Alexander, G.M., Rogan, S.C., Abbas, A.I., Armbruster, B.N., Pei, Y., Allen, J.A., Nonneman, R.J., Hartmann, J.,  
26 Moy, S.S., Nicolelis, M.A., *et al.* (2009). Remote control of neuronal activity in transgenic mice expressing evolved G  
27 protein-coupled receptors. *Neuron* 63, 27-39.
- 28
- 29 Allène, C., Cattani, A., Ackman, J.B., Bonifazi, P., Aniksztejn, L., Ben-Ari, Y., and Cossart, R. (2008). Sequential  
30 generation of two distinct synapse-driven network patterns in developing neocortex. *J Neurosci* 28, 12851-12863.
- 31
- 32 Blankenship, A. G. and Feller, M. B. (2010). Mechanisms underlying spontaneous patterned activity in developing  
33 neural circuits. *Nat Rev Neurosci* 11, 18-29.
- 34
- 35 Chandrasekaran, A.R., Plas, D.T., Gonzalez, E., and Crair, M.C. (2005). Evidence for an instructive role of retinal  
36 activity in retinotopic map refinement in the superior colliculus of the mouse. *J Neurosci* 25, 6929-6938.
- 37
- 38 Cheyne, J. E., Zabouri, N., Baddeley, D. and Lohmann C. (2019). Spontaneous activity patterns are altered in the  
39 developing visual cortex of the *Fmr1* knockout mouse. *Front. Neural Circuits* 13:57.
- 40
- 41 De León Reyes, N., Bragg-Gonzalo, L. and Nieto, M. (2020). Development and plasticity of the corpus callosum.  
42 *Development* 147, 18, dev.189738
- 43
- 44 Dhande, O.S., Hua, E.W., Guh, E. Yeh, J., Bhatt, S., Zhang, Y., Ruthazer, E.S., Feller, M.B., and Crair, M.C. (2011).  
45 Development of single retinofugal axon arbors in normal and  $\beta 2$  knock-out mice. *J Neurosci* 31, 3384-3399.
- 46
- 47 Galli, L., and Maffei, L. (1988). Spontaneous impulse activity of rat retinal ganglion cells in prenatal life. *Science* 242,  
48 90-91.
- 49
- 50 Garaschuk, O., Linn, J., Eilers, J., and Konnerth, A. (2000). Large-scale oscillatory calcium waves in the immature  
51 cortex. *Nat Neurosci* 3, 452-459.
- 52
- 53 Golshani, P., Gonçalves, J.T., Khoshkhoo, S., Mostany, R., Smirnakis, S., and Portera-Cailliau, C. (2009). Internally  
54 mediated developmental desynchronization of neocortical network activity. *J Neurosci* 29, 10890-10899.

35

36 Gribizis, A., Ge, X., Daigle, T., Ackman, J.B., Zeng, H., Lee, D., and Crair M.C. (2019). Visual cortex gains  
37 independence from peripheral drive before eye opening. *Neuron* 104, 711-723.

38

39 Guemez-Gamboa, A., Xu, L., Meng, D., and Spitzer, N.C. (2014). Non-cell-autonomous mechanism of  
40 activity-dependent neurotransmitter switching. *Neuron* 82, 1004-1016.

41

42 Hagihara, K.M., Murakami, T., Yoshida, T., Tagawa, Y., and Ohki, K. (2015). Neuronal activity is not required for the  
43 initial formation and maturation of visual selectivity. *Nat Neurosci* 18, 1780-1788.

44

45 Hagihara, K.M., Ishikawa, A.W., Yoshimura, Y., Tagawa, Y., and Ohki, K. (2020) Long-range interhemispheric  
46 projection neurons show biased response properties and fine-scale local subnetworks in mouse visual cortex. *Cerebral*  
47 *Cortex*, Online ahead of print.

48

49 Hooks, B.M., and Chen, C. (2006). Distinct roles for spontaneous and visual activity in remodeling of the  
50 retinogeniculate synapse. *Neuron* 52, 281-291.

51

52 Hubel, D.H., and Wiesel, T.N. (1967). Cortical and callosal connections concerned with the vertical meridian of visual  
53 fields in the cat. *J Neurophysiol* 30, 1561-1573.

54

55 Huberman, A.D., Feller, M.B., and Chapman, B. (2008). Mechanisms underlying development of visual maps and  
56 receptive fields. *Annu Rev Neurosci* 31, 479-509.

57

58 Johns, D.C., Marx, R., Mains, R.E., O'Rourke, B., and Marbán, E. (1999). Inducible genetic suppression of neuronal  
59 excitability. *J Neurosci* 19, 1691-1697.

60

61 Katz, L., and Shatz, C. (1996). Synaptic activity and the construction of cortical circuits. *Science* 274, 1133-1138.

62

63 Khazipov, R., and Luhmann, H. (2006). Early patterns of electrical activity in the developing cerebral cortex of  
64 humans and rodents. *Trends Neurosci* 29, 414-418.

65

66 Kerlin, A.M., Andermann, M.L., Berezovskii, V.K., and Reid, R.C. (2010). Broadly tuned response properties of  
67 diverse inhibitory neuron subtypes in mouse visual cortex. *Neuron* 67, 858-871.

68

69 Lein, E.S., and Shatz, C.J. (2000). Rapid regulation of brain-derived neurotrophic factor mRNA within eye-specific  
70 circuits during ocular dominance column formation. *J Neurosci* 20, 1470-1483.

71

- 72 Ma, L., Wu, Y., Qiu, Q., Scheerer, H., Moran, A., and Yu, C.R. (2014). A developmental switch of axon targeting in  
73 the continuously regenerating mouse olfactory system. *Science* 344, 194-197.
- 74
- 75 Matsumoto, N., Hoshiko M., Sugo, N., Fukazawa, Y., and Yamamoto, N. (2016) Synapse-dependent and independent  
76 mechanisms of thalamocortical axon branching are regulated by neuronal activity. *Dev Neurobiol* 76, 323-336.
- 77
- 78 Meister, M., Wong, R.O., Baylor, D.A., and Shatz, C.J. (1991). Synchronous bursts of action potentials in ganglion  
79 cells of the developing mammalian retina. *Science* 252, 939-943.
- 80
- 81 Mitchell, B.D., and Macklis, J.D. (2005). Large-scale maintenance of dual projections by callosal and frontal cortical  
82 projection neurons in adult mice. *J Comp Neurol* 482, 17-32.
- 83
- 84 Mizuno, H., Hirano, T., and Tagawa, Y. (2007). Evidence for activity-dependent cortical wiring: formation of  
85 interhemispheric connections in neonatal mouse visual cortex requires projection neuron activity. *J Neurosci* 27,  
86 6760-6770.
- 87
- 88 Mizuno, H., Hirano, T., and Tagawa, Y. (2010). Pre-synaptic and post-synaptic neuronal activity supports the axon  
89 development of callosal projection neurons during different post-natal periods in the mouse cerebral cortex. *Eur J*  
90 *Neurosci* 31, 410-424.
- 91
- 92 Nakazawa, S., Yoshimura, Y., Takagi, M., Mizuno, H., Iwasato, T. (2020). Developmental phase transitions in spatial  
93 organization of spontaneous activity in postnatal barrel cortex layer 4. *J Neurosci* 40, 7637-7650.
- 94
- 95 Ohki, K., Chung, S., Chng, Y., Kara, P., and Reid, R. C. (2005) Functional imaging with cellular resolution reveals  
96 precise micro-architecture in visual cortex. *Nature* 433, 569-603.
- 97
- 98 Olavarria, J., and Montero, V. (1984). Relation of callosal and striate-extrastriate cortical connections in the rat:  
99 morphological definition of extrastriate visual areas. *Exp Brain Res* 54, 240-252.
- 100
- 101 Paul, L.K. (2011). Developmental malformation of the corpus callosum: A review of typical callosal development and  
102 examples of developmental disorders with callosal involvement. *J Neurodev Disord* 3, 3–27.
- 103
- 104 Penn, A., Riquelme, P., Feller, M., and Shatz, C. (1998). Competition in retinogeniculate patterning driven by  
105 spontaneous activity. *Science* 279, 2108-2112.
- 106

- 17 Pfeiffenberger, C., Cutforth, T., Woods, G., Yamada, J., Rentería, R.C., Copenhagen, D.R., Flanagan, J.G., and  
18 Feldheim, D.A. (2005). Ephrin-As and neural activity are required for eye-specific patterning during retinogeniculate  
19 mapping. *Nat Neurosci* 8, 1022-1027.
- 20  
21  
22 Rochefort, N.L., Garaschuk, O., Milos, R.I., Narushima, M., Marandi, N., Pichler, B., Kovalchuk, Y., and Konnerth, A.  
23 (2009). Sparsification of neuronal activity in the visual cortex at eye-opening. *Proc Natl Acad Sci U S A* 106,  
24 15049-15054.
- 25 Rodríguez-Tornos, F.M., Briz, C.G., Weiss, L.A., Sebastián-Serrano, A., Ares, S., Navarrete, M., Frangeul, L., Galazo,  
26 M., Jabaudon, D., Esteban, J.A., and Nieto, M. (2016). Cux1 Enables Interhemispheric Connections of Layer II/III  
27 Neurons by Regulating Kv1-Dependent Firing. *Neuron* 89, 494-506.
- 28  
29 Shimojo, M., Courchet, J., Pieraut, S., Torabi-Rander, N., Sando, R., Polleux, F., and Maximov, A. (2015). SNAREs  
30 Controlling Vesicular Release of BDNF and Development of Callosal Axons. *Cell Rep* 11, 1054-1066.
- 31  
32 Siegel, F., Heimel, J.A., Peters, J., and Lohmann, C. (2012). Peripheral and central inputs shape network dynamics in  
33 the developing visual cortex in vivo. *Curr Biol* 22, 253-258.
- 34  
35 Smith, G.B., Hein B., Whitney, D.E., Fitzpatrick, D., and Kaschube, M. (2018) Distributed network interactions and  
36 their emergence in developing neocortex. *Nat Neurosci* 21, 1600-1608.
- 37  
38 Spitzer, N.C. (2006). Electrical activity in early neuronal development. *Nature* 444, 707-712.
- 39  
40 Stellwagen, D., and Shatz, C.J. (2002). An instructive role for retinal waves in the development of retinogeniculate  
41 connectivity. *Neuron* 33, 357-367.
- 42  
43 Suárez, R., Fenlon, L.R., Marek, R., Avitan, L., Sah, P., Goodhill, G.J., and Richards, L.J. (2014). Balanced  
44 interhemispheric cortical activity is required for correct targeting of the corpus callosum. *Neuron* 82, 1289-1298.
- 45  
46 Tagawa, Y., and Hirano, T. (2012). Activity-dependent callosal axon projections in neonatal mouse cerebral cortex.  
47 *Neural Plast* 2012, 797295.
- 48  
49 Tao, X., Finkbeiner, S., Arnold, D.B., Shaywitz, A.J., and Greenberg, M.E. (1998). Ca<sup>2+</sup> influx regulates BDNF  
50 transcription by a CREB family transcription factor-dependent mechanism. *Neuron* 20, 709-726.
- 51  
52 Wang, C.L., Zhang, L., Zhou, Y., Zhou, J., Yang, X.J., Duan, S.M., Xiong, Z.Q., and Ding, Y.Q. (2007).  
53 Activity-dependent development of callosal projections in the somatosensory cortex. *J Neurosci* 27, 11334-11342.

l4

l5 Winnubst, J., Cheyne, J.E., Niculescu, D., and Lohmann, C. (2015). Spontaneous Activity Drives Local Synaptic  
l6 Plasticity In Vivo. *Neuron* 87, 399-410.

l7

l8 Wong, R., Meister, M., and Shatz, C. (1993). Transient period of correlated bursting activity during development of  
l9 the mammalian retina. *Neuron* 11, 923-938.

l10

l11 Wong, R.O. (1999). Retinal waves and visual system development. *Annu Rev Neurosci* 22, 29-47.

l12

l13 Wosniack, M. E., Kirchner, J. H., Chao, L-Y., Zabouri, N., Lohmann, C. and Gjorgjieva, J. (2021). Adaptation of  
l14 spontaneous activity in the developing visual cortex. *eLife* 10:e61619.

l15

l16 Yang, J.W., Hanganu-Opatz, I.L., Sun, J.J., and Luhmann, H.J. (2009). Three patterns of oscillatory activity  
l17 differentially synchronize developing neocortical networks in vivo. *J Neurosci* 29, 9011-9025.

l18

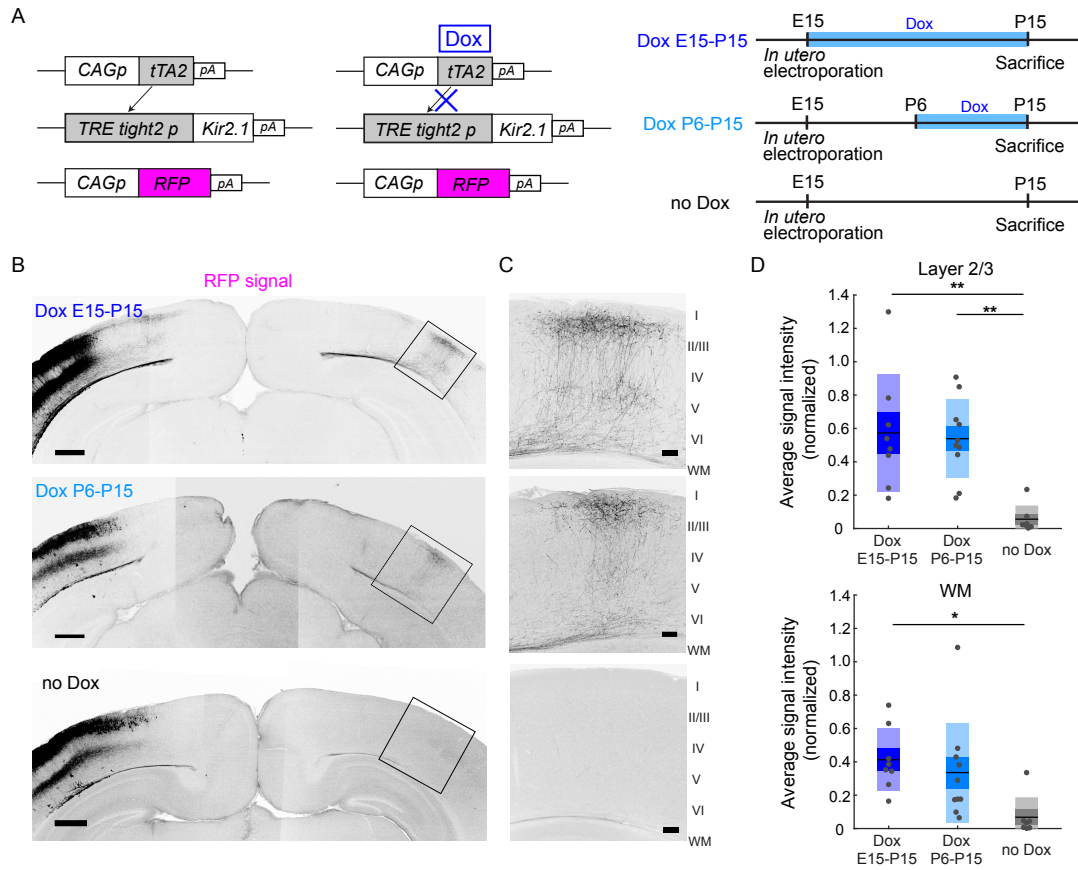

Fig.1

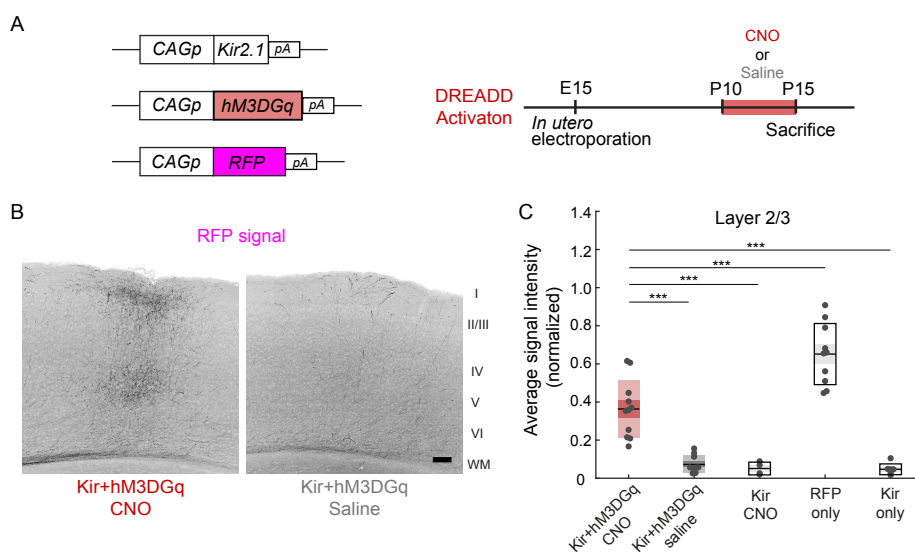

Fig.2

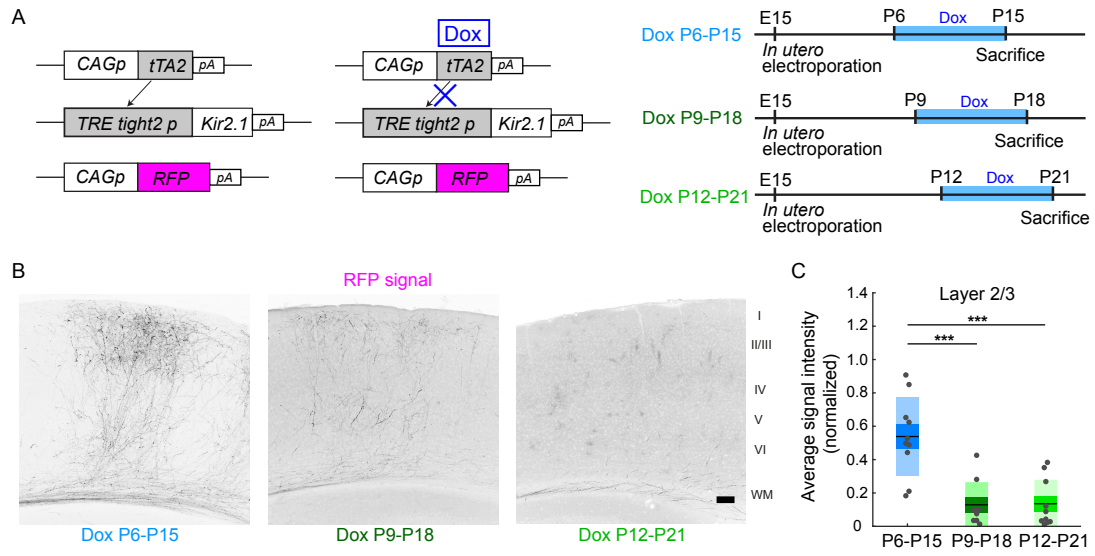

Fig.3



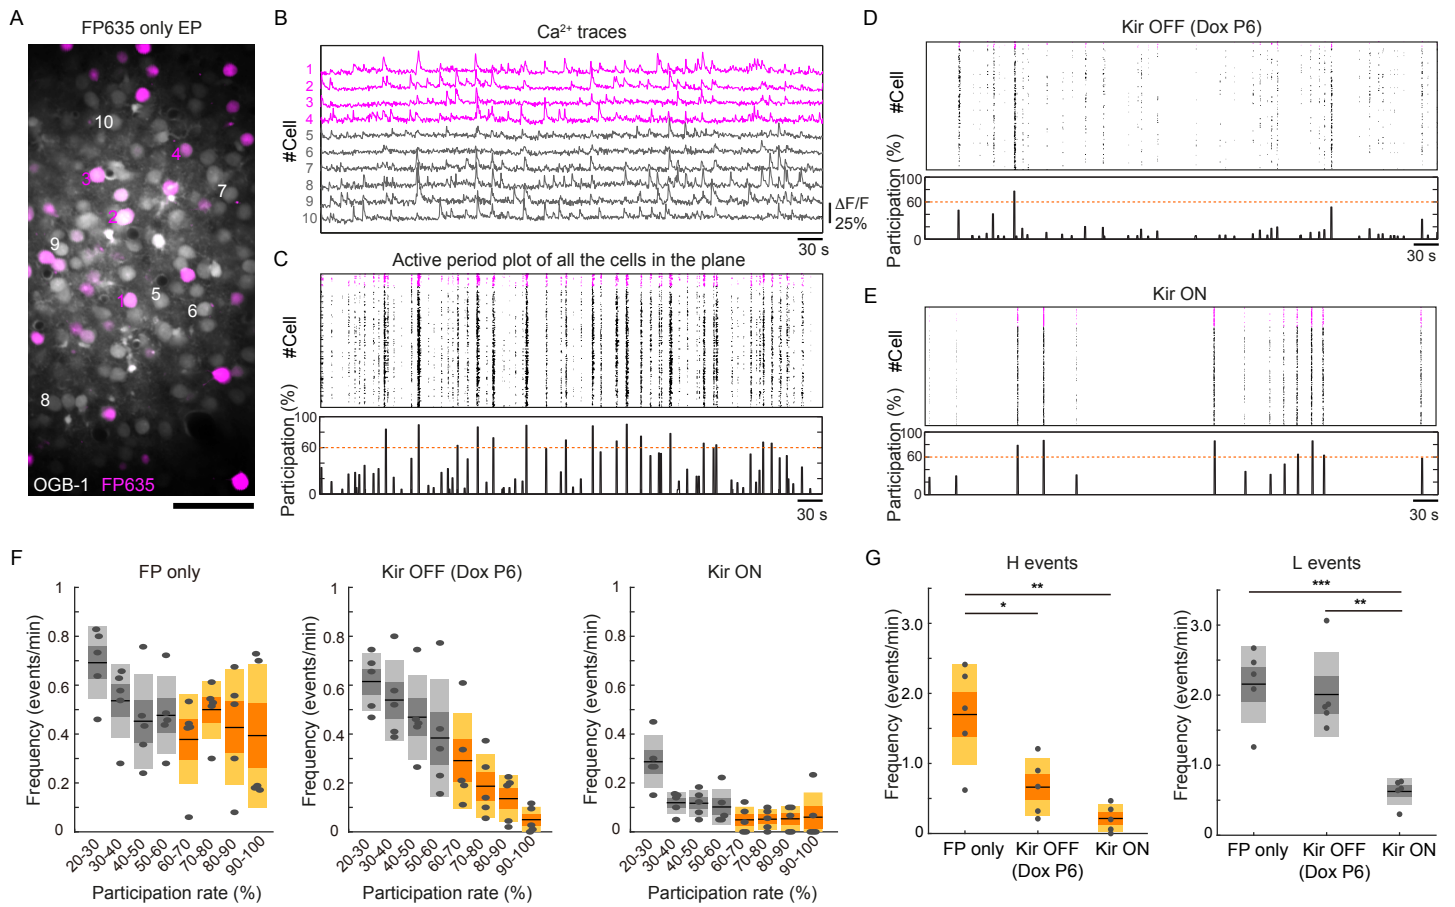

Fig.4
